# Supplementary material for: Nsun2 coupling with RoRγt shapes the fate of Th17 cells and promotes colitis
Source: PubMed Central journal article supplement (PMC9932167; doi:10.1038/s41467-023-36595-w), 2023-02-16
Supplement: 41467_2023_36595_MOESM1_ESM.pdf [file 41467_2023_36595_MOESM1_ESM.pdf]

## **Supplementary Information**

### **Nsun2 coupling with RoRyt shapes the fate of Th17 cells and promotes colitis**

Wen-Lan Yang, Weinan Qiu, Ting Zhang, Kai Xu, Zi-Juan Gu, Yu Zhou, Heng-Ji Xu, Zhong-Zhou Yang, Bin Shen, Yong-Liang Zhao, Qi Zhou, Ying Yang, Wei Li, Peng-Yuan Yang, Yun-Gui Yang

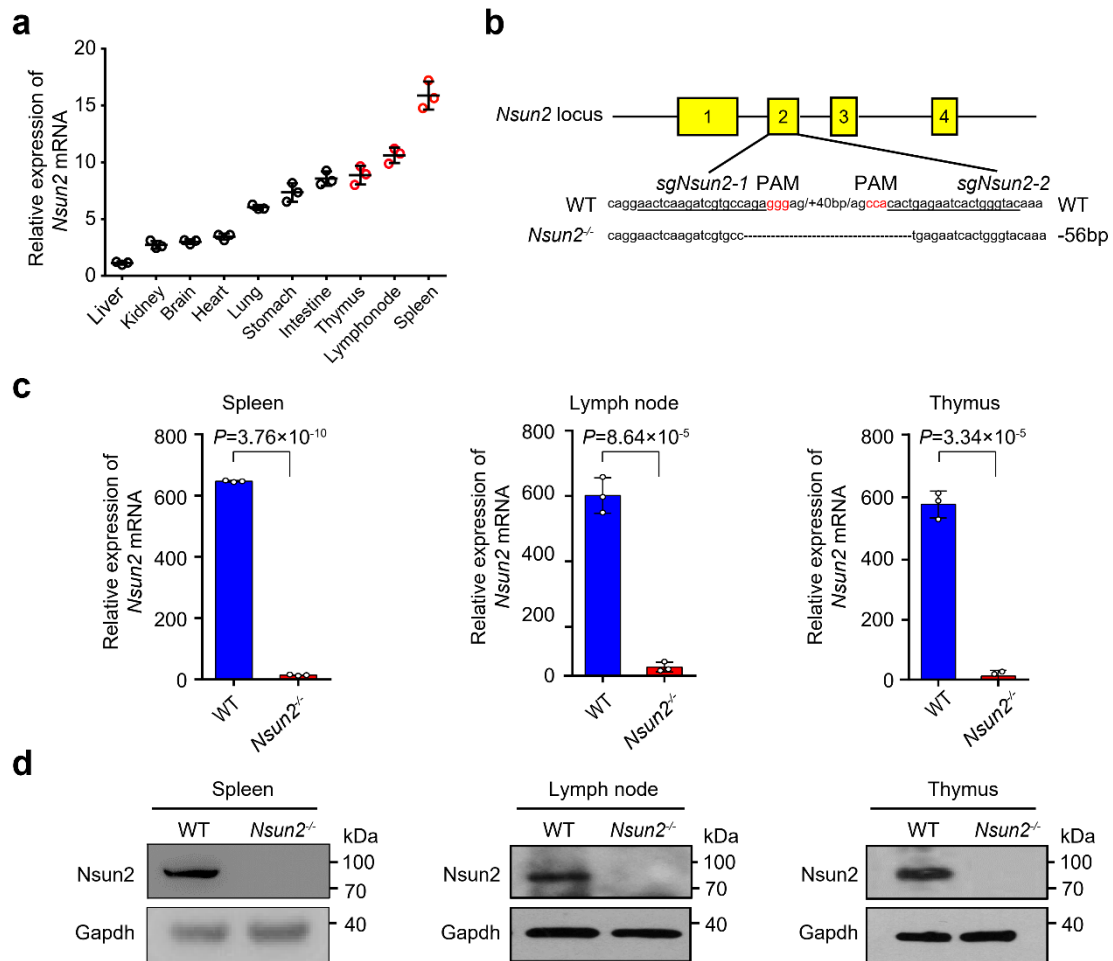

**Supplementary Fig. 1 | The expression of *Nsun2* in immune organs and validation of *Nsun2* knockout mice.**

**a**, The mRNA level of *Nsun2* in mouse organs were detected by RT-qPCR ( $n = 3$  per group). **b**, Strategies for construction of *Nsun2* knockout mice. **c**, **d**, The knockout efficiency of *Nsun2* was detected. Both RNA and protein were extracted from the spleen, lymph node, and thymus of wild-type and *Nsun2*<sup>-/-</sup> mice respectively, and then carried out RT-qPCR ( $n = 3$  per group) (**c**) and western blot (**d**) to detect *Nsun2* expression. Data are representative of two independent experiments.  $P$  values are calculated by using two-tailed unpaired Student's  $t$ -test. Error bars represent mean  $\pm$  s.e.m (**a**, **c**). Source data are provided as a Source Data file.

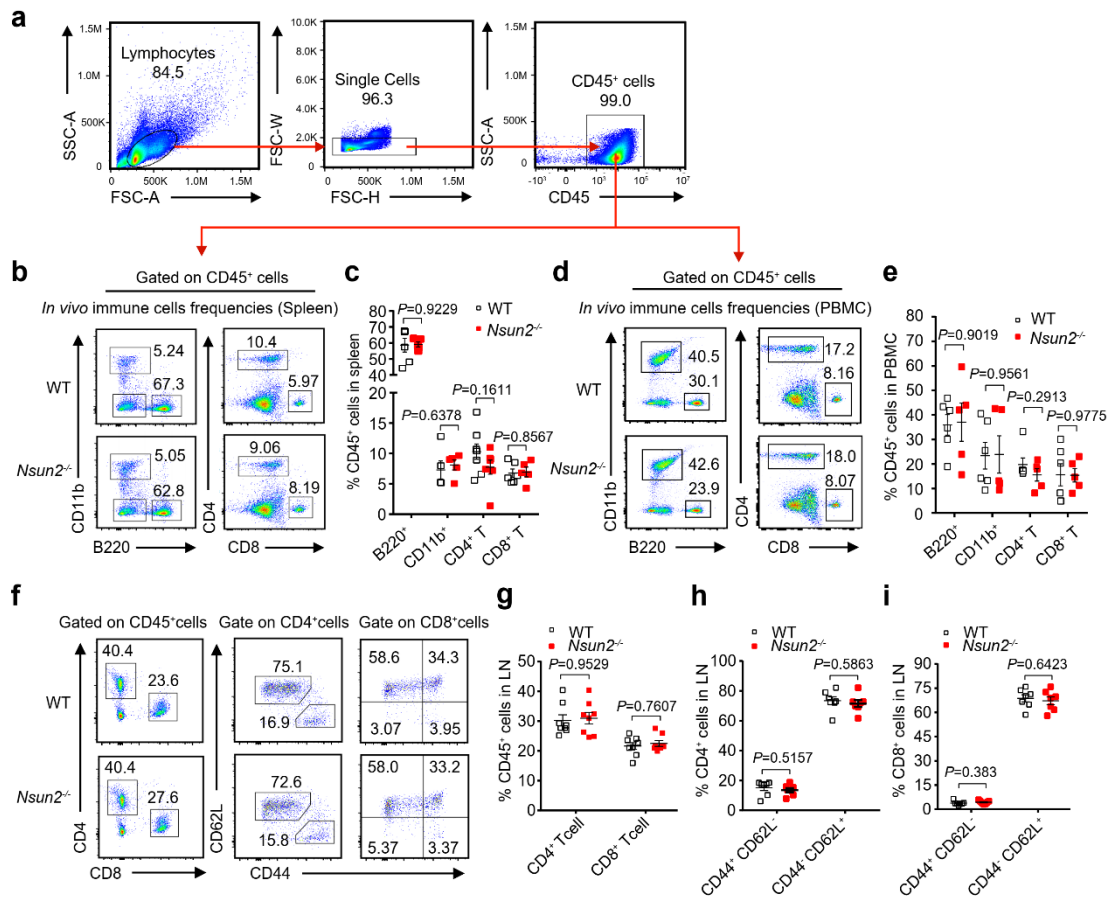

**Supplementary Fig. 2 | Immunophenotype analysis of wild-type and *Nsun2*<sup>-/-</sup> mice.**

**a.** Gating strategy to Supplementary Fig. 2b-i. **b-e,** The T cell lineages frequencies of B220<sup>+</sup>, CD11b<sup>+</sup>, CD4<sup>+</sup> and CD8<sup>+</sup> cells in spleen (**b, c**) and peripheral blood mononuclear cell (PBMC) (**d, e**) of littermate wild-type and *Nsun2*<sup>-/-</sup> mice were analyzed by FACS. Summary of the frequency of each cells are shown in **c** ( $n = 6$  for wild-type and  $n = 5$  for *Nsun2*<sup>-/-</sup> in B220<sup>+</sup> cells and CD8<sup>+</sup> cells;  $n = 5$  for wild-type and *Nsun2*<sup>-/-</sup> in CD11b<sup>+</sup> cells;  $n = 8$  for wild-type and  $n = 7$  for *Nsun2*<sup>-/-</sup> in CD4<sup>+</sup> cells) and **e** ( $n = 6$  for wild-type and  $n = 5$  for *Nsun2*<sup>-/-</sup> in each cells). **f-i,** The cell frequencies of CD4<sup>+</sup> cells, CD8<sup>+</sup> cells, naïve T cells and activated T cells in lymph nodes of wild-type and *Nsun2*<sup>-/-</sup> mice were analyzed by FACS. Summary of the frequency of each cells are shown in **g-i** ( $n = 7$  per group). All data are two independent experiments.  $P$  values are calculated by using two-tailed unpaired Student's  $t$ -test. Error bars represent mean  $\pm$  s.e.m (**c, e, g-i**). Source data are provided as a Source Data file.

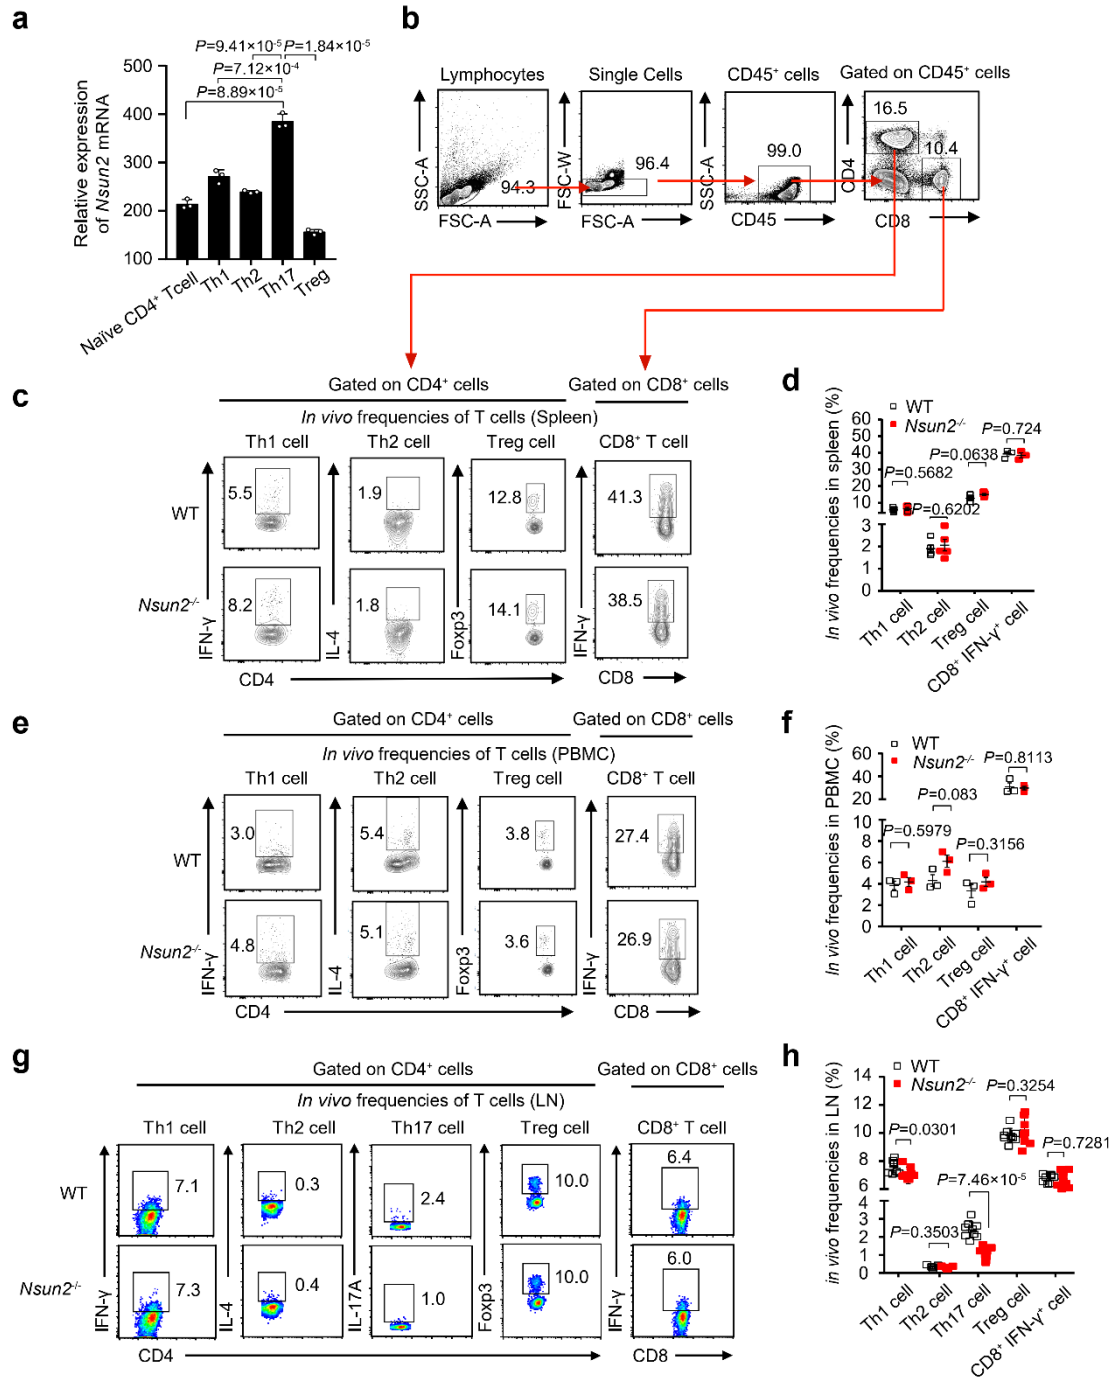

### Supplementary Fig. 3 | *Nsun2* is critical for Th17 cells differentiation *in vivo*.

**a**, The mRNA expression level of *Nsun2* in naïve CD4<sup>+</sup> T cells, Th1, Th2, Th17, and Treg cells were detected by RT-qPCR ( $n = 3$  per group). Sorted naïve CD4<sup>+</sup> T cells from lymph nodes of wild-type C57BL/6 mice were differentiated under Th1, Th2, Th17 and Treg inducing conditions respectively, and total RNA were then isolated from each T cell subsets. **b**, Gating strategy related to Fig. 1c-d and Supplementary Fig. 3c-h. **c**, **d**, The percentage of CD4<sup>+</sup> IFN- $\gamma$ <sup>+</sup> Th1, CD4<sup>+</sup> IL-4<sup>+</sup> Th2, CD4<sup>+</sup> FOXP3<sup>+</sup> Treg and CD8<sup>+</sup> IFN- $\gamma$ <sup>+</sup> cells in spleen from littermate wild-type and *Nsun2*<sup>-/-</sup> mice were analyzed by FACS. Summary of the frequency of each cells are shown in **d** ( $n = 5$  for wild-type and *Nsun2*<sup>-/-</sup> in Th1, Th2 and Treg cells;  $n = 3$  for wild-type and *Nsun2*<sup>-/-</sup> in CD8<sup>+</sup> IFN- $\gamma$ <sup>+</sup> cells). **e**, **f**, The percentage of CD4<sup>+</sup> IFN- $\gamma$ <sup>+</sup> Th1, CD4<sup>+</sup> IL-4<sup>+</sup> Th2,

CD4<sup>+</sup> FOXP3<sup>+</sup> Treg and CD8<sup>+</sup> IFN- $\gamma$ <sup>+</sup> cells in PBMC from littermate wild-type and *Nsun2*<sup>-/-</sup> mice were analyzed by FACS. Summary of the frequency of each cells are shown in **f** ( $n = 3$  per group). **g, h**, The percentage of CD4<sup>+</sup> IFN- $\gamma$ <sup>+</sup> Th1, CD4<sup>+</sup> IL-4<sup>+</sup> Th2, CD4<sup>+</sup> IL-17A<sup>+</sup> Th17, CD4<sup>+</sup> FOXP3<sup>+</sup> Treg and CD8<sup>+</sup> IFN- $\gamma$ <sup>+</sup> cells in lymph node from littermate wild-type and *Nsun2*<sup>-/-</sup> mice were analyzed by FACS. Summary of the frequency of each cells are shown in **h** ( $n = 9$  per group). *P* values are calculated by using two-tailed unpaired Student's *t*-test. Error bars represent mean  $\pm$  s.e.m (**a, d, f and h**). Source data are provided as a Source Data file.

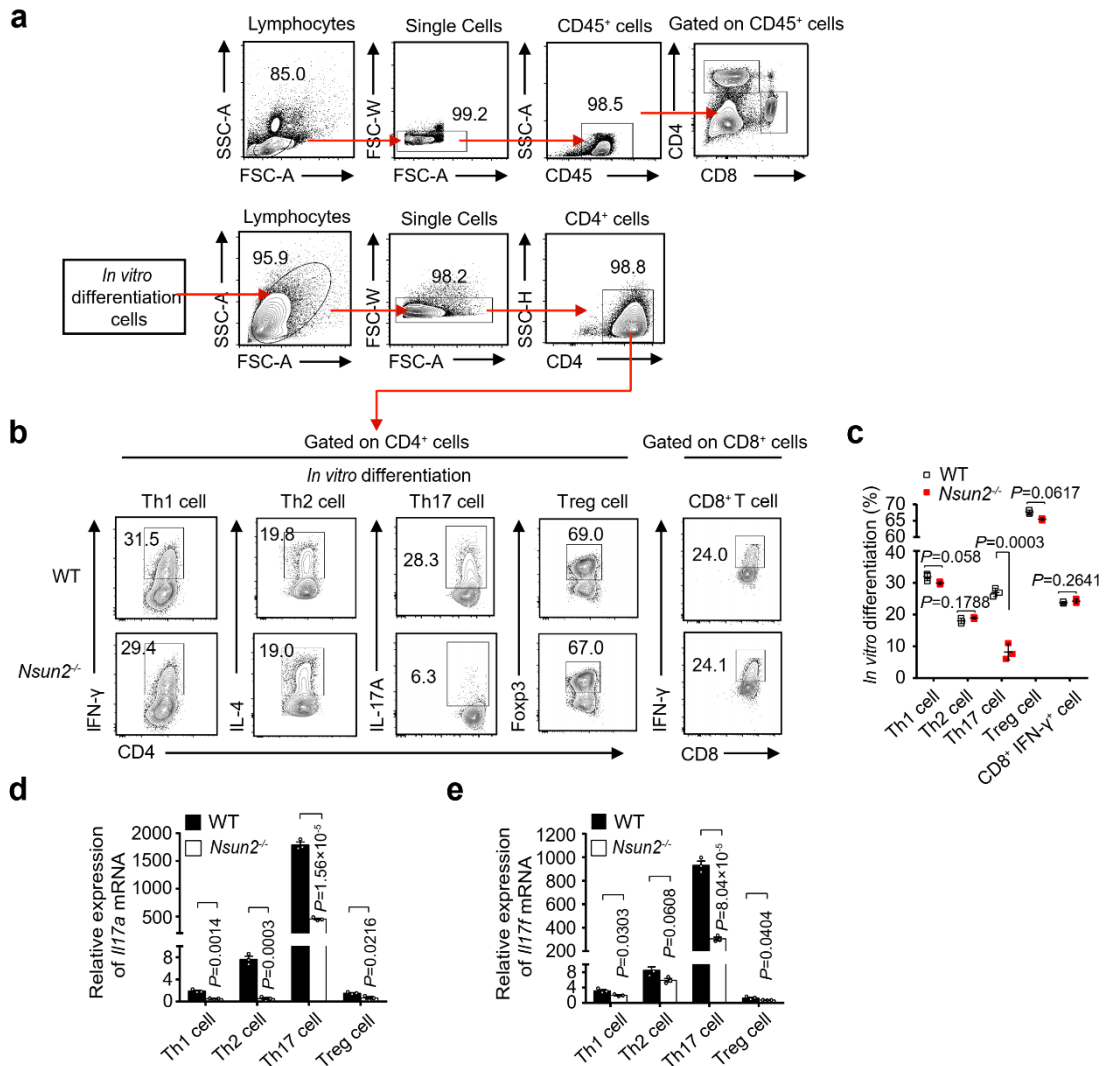

**Supplementary Fig. 4 | *Nsun2* is critical for Th17 cells differentiation *in vitro*.**

**a.** Gating strategy related to Fig. 1e-f and Supplementary Fig. 4b-c. **b, c,** The *in vitro* differentiation frequencies of Th1, Th2, Treg, Th17 and CD8<sup>+</sup> T cells in wild-type and *Nsun2*<sup>-/-</sup> mice were analyzed by FACS. Summary of the frequency of each cells are shown in **c** ( $n = 3$  per group). **d, e,** The mRNA level of *Il17a* and *Il17f* in littermate wild-type and *Nsun2*<sup>-/-</sup> T subsets were detected by RT-qPCR ( $n = 3$  per group). All data are at least two independent experiments. *P* values are calculated by using two-tailed unpaired Student's *t*-test. Error bars represent mean  $\pm$  s.e.m (**c-e**). Source data are provided as a Source Data file.

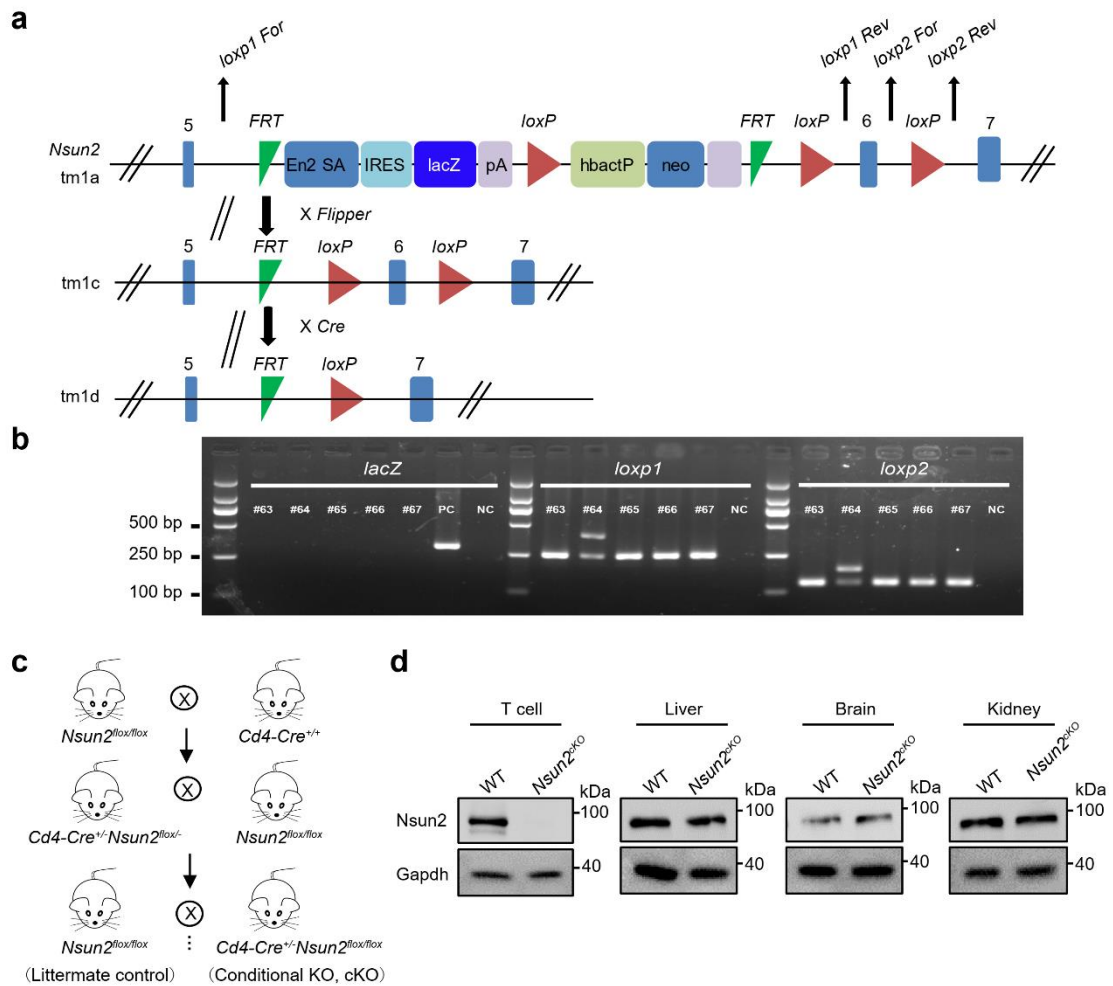

**Supplementary Fig. 5 | Strategies for construction of *Nsun2*<sup>cKO</sup> mice.**

**a**, Schema for gene targeting to generate floxed *Nsun2* mice, the KO first mice (tm1a) were mated with FLPeR mice to delete the *Neo* cassette to generate *Nsun2*-floxed mice (tm1c), *Nsun2* conditional KO mice should be generated by crossing with *cre* mice (tm1d). **b**, Genotyping for generating *Nsun2* floxed mice. The heterozygous floxed mice (#64) was typed by two pairs of primers: *loxp1*(f1: 391 bp, WT: 251 bp); *loxp2*(f2: 182 bp, WT: 128 bp) versus positive control (PC) and negative control (NC). **c**, Strategy for construction of *Nsun2*<sup>flox/flox</sup>; *Cd4-Cre*<sup>+/-</sup> mice. **d**, Determine conditional knockout of *Nsun2* in T cells sorting from lymph nodes in wild-type or *Nsun2*<sup>cKO</sup> mice by western blot, and the *Nsun2* protein expression in liver, brain and kidney as the control.

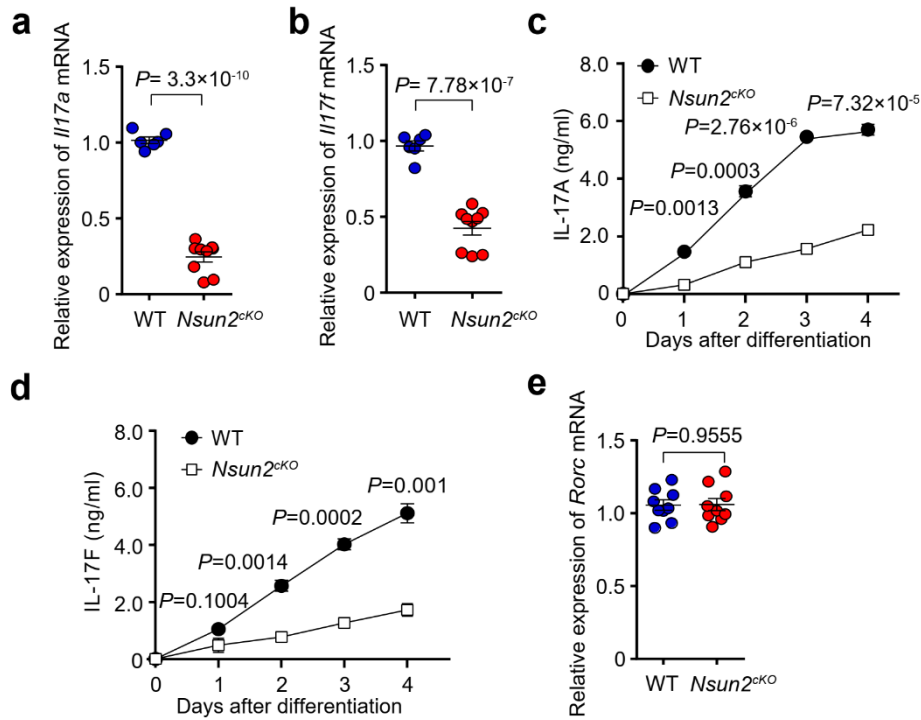

**Supplementary Fig. 6 | T cell-specific Nsun2 deletion impairs Th17 generation.**

**a, b**, The mRNA expression of *Il17a* (**a**) and *Il17f* (**b**) in wild-type and *Nsun2<sup>cKO</sup>* Th17 cells were detected by RT-qPCR ( $n = 6$  for wild-type;  $n = 9$  for *Nsun2<sup>cKO</sup>*). **c, d**, The secretions of IL-17A (**c**) and IL-17F (**d**) was detected by ELISA. The supernatants were collected from wild-type and *Nsun2<sup>cKO</sup>* Th17-inducing media as indicated time points (0-4 days) ( $n = 3$  per group). **e**, The mRNA expression of *Rorc* in Th17 cells was detected by RT-qPCR ( $n = 9$  per group). All data are at least two independent experiments.  $P$  values are calculated by using two-tailed unpaired Student's  $t$ -test. Error bars represent mean  $\pm$  s.e.m (**a-e**). Source data are provided as a Source Data file.



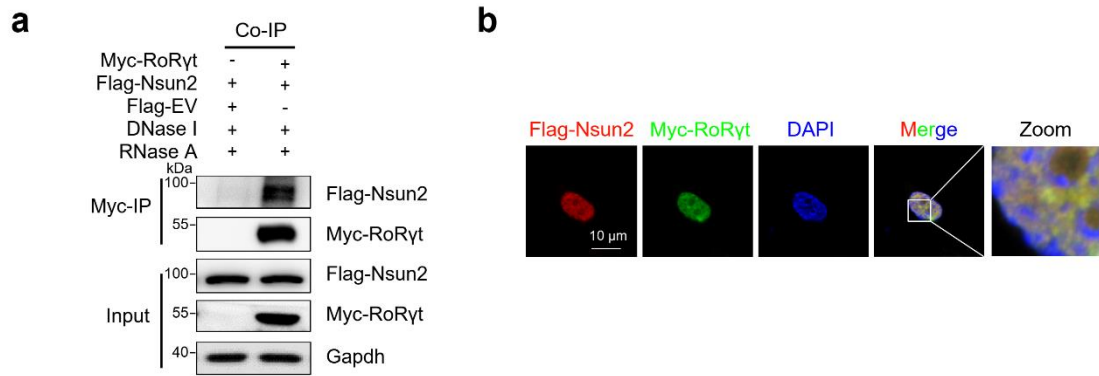

**Supplementary Fig. 7 | Nsun2 reprograms Th17 features *via* direct interaction with RoRyt.**

**a**, Co-immunoprecipitation showing the interaction of Nsun2 and RoRyt *in vitro*. HEK293T cells were transfected with Myc-RoRyt and Flag-Nsun2 or Flag-EV (as control) plasmids for 2 days. Cell lysates were collected and treated with DNase I and RNase A before anti-Myc-immunoprecipitation. **b**, Immunofluorescence showing the interaction of Flag-Nsun2 and Myc-RoRyt in HEK293T cells. HEK293T cells were transfected with Myc-RoRyt and Flag-Nsun2 plasmids for 24 hours, and then were subjected to immunofluorescence assay. All data are representative of two independent experiments. Source data are provided as a Source Data file.

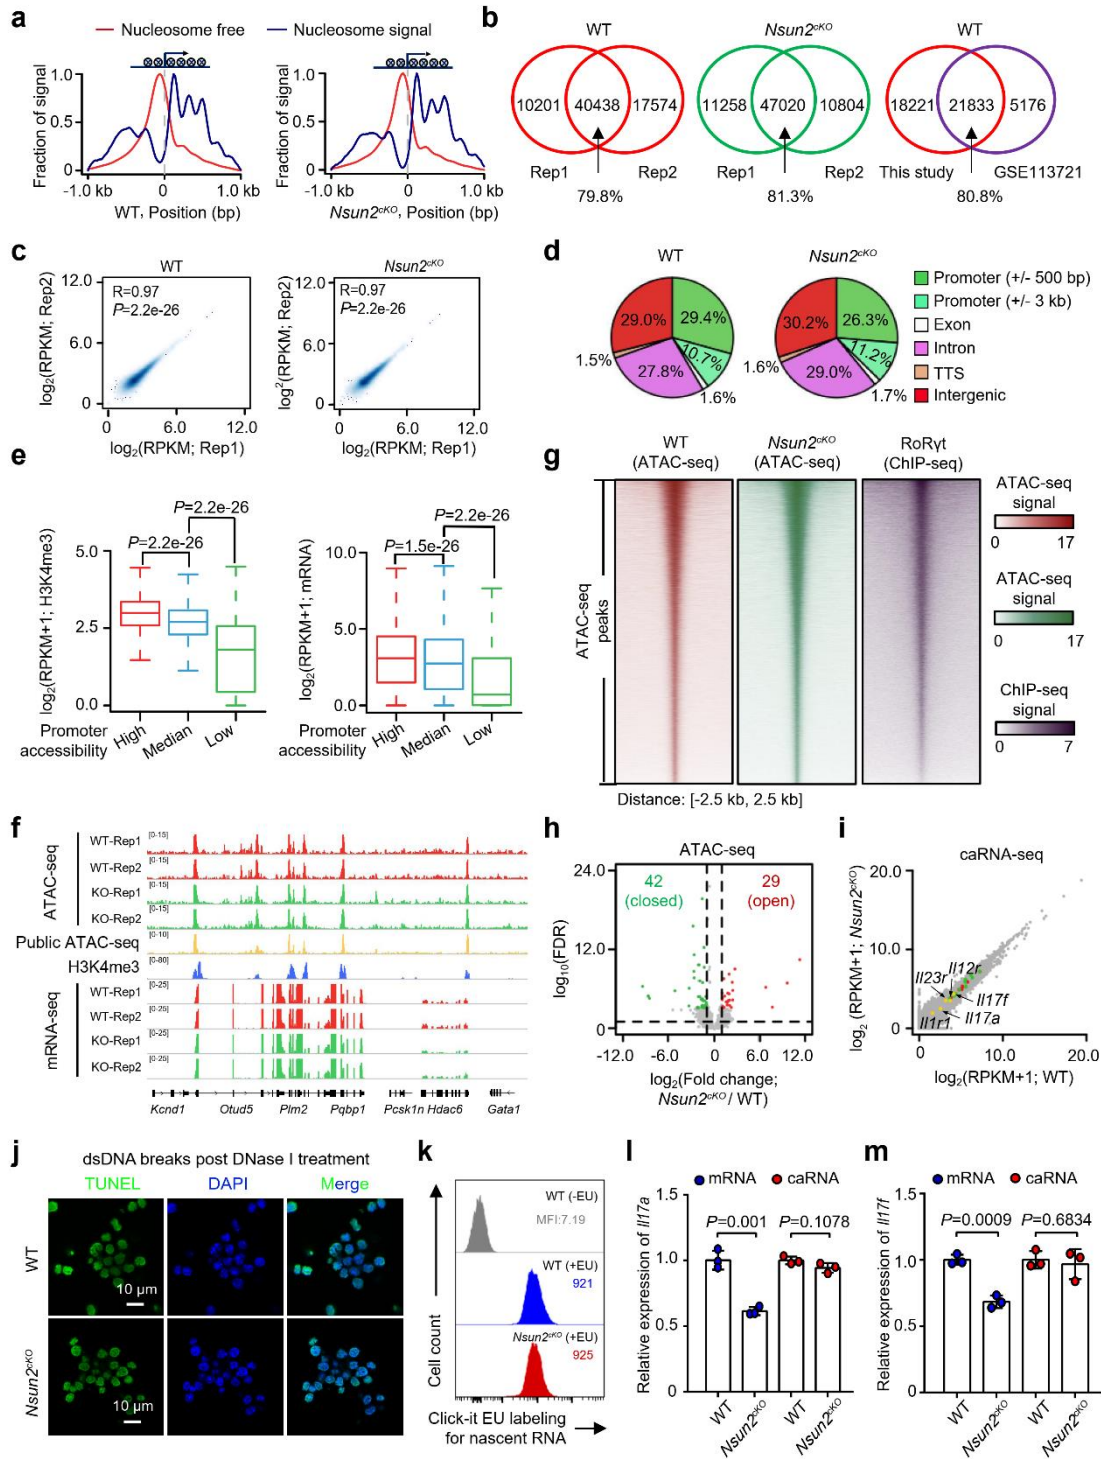

**Supplementary Fig. 8 | Nsun2 deficiency does not dampen the chromatin state and transcription initiation.**

**a**, Footprints of nucleosome around TSSs using ATAC-seq of wild-type and *Nsun2<sup>cKO</sup>* Th17 cells. **b**, Venn plots showing the overlap of ATAC-seq peaks between two replicates of wild-type and *Nsun2<sup>cKO</sup>* Th17 cells, as well as the overlap of ATAC-seq peaks detected in wild-type Th17 cells for this study and GSE113721. **c**, Scatter plots showing the repeatability of the ATAC-seq enrichment between two replicates of wild-type and *Nsun2<sup>cKO</sup>* Th17 cells.  $P$  values are calculated by using two-sided student's  $t$ -test. **d**, Genome-wide distribution of peaks for

wild-type and *Nsun2<sup>cko</sup>* Th17 cells identified by MACS2. **e**, Box plots showing promoter enrichment of H3K4me3 (left; GSE40918) and gene expression (right; mRNA-seq) in wild-type Th17 cell for genes with different promoter enrichment of ATAC-seq. Only the top 15K genes with highest promoter enrichment of ATAC-seq were used and then were divided into three equal groups in this analysis. *P* values were determined by two-way Mann-Whitney U test and only value between  $Q1-1.5*IQR$  and  $Q3+1.5*IQR$  has been shown in boxplot. **f**, IGV tracks showing the ATAC-seq, H3K4me3, and mRNA-seq signal in Th17 cells. **g**, ATAC-seq summit-centered heatmap of ATAC-seq signal in wild-type and *Nsun2<sup>cko</sup>*, as well as ROR $\gamma$ t ChIP-seq signal (GSE40918) in the same regions for all ATAC-seq peaks. **h**, Volcano plot showing the open (in Red) and closed (in Green) ATAC-seq peaks upon *Nsun2* deficiency in Th17 cells. **i**, Scatter plot of expression of caRNAs in wild-type compared to *Nsun2<sup>cko</sup>* Th17 cells. Part of important genes involving in T cell receptor signaling pathway (in Red), T cell differentiation (in Green) and cytokines (in Gold) were also shown. **j**, TUNEL assay to detect the global chromatin accessibility in wild-type and *Nsun2<sup>cko</sup>* Th17 cells. **k**, Click-it EU labeling and FACS analysis to detect global nascent RNA level in wild-type and *Nsun2<sup>cko</sup>* Th17 cells. **l**, **m**, RT-qPCR showing the expression of *Il17a* and *Il17f* on caRNA and mRNA level ( $n = 3$  per group). All data are two independent experiments. *P* values are calculated by using two-tailed unpaired Student's *t*-test. Error bars represent mean  $\pm$  s.e.m (**l**, **m**). Source data are provided as a Source Data file.

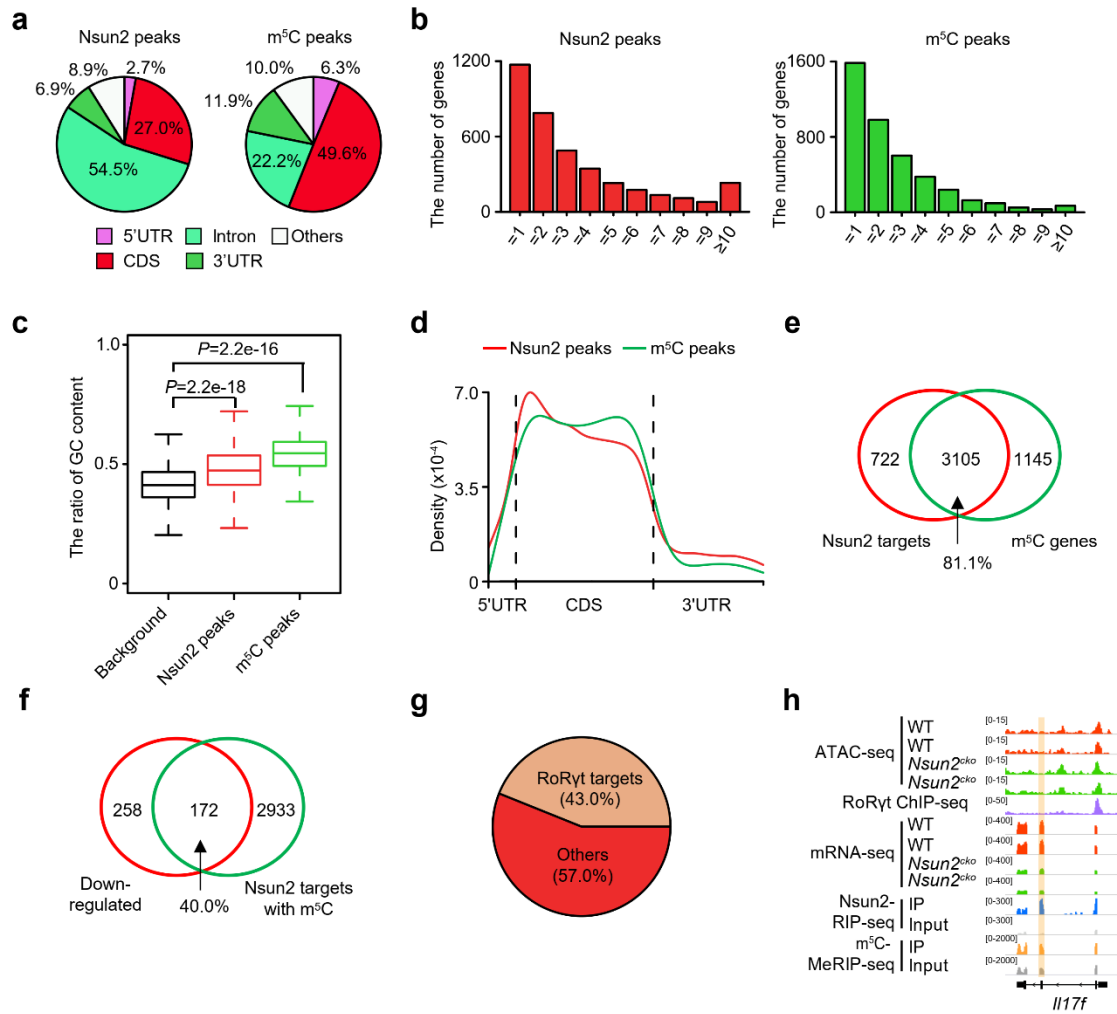

### Supplementary Fig. 9 | Quality control of Nsun2 RIP-seq and m<sup>5</sup>C MeRIP-seq.

**a**, Pie diagrams showing the ratio of Nsun2 (left) and m<sup>5</sup>C peaks (right) for ncRNAs or different segments of mRNAs. **b**, Bar plots showing numbers of genes with different number of Nsun2 (left) and m<sup>5</sup>C peaks (right). **c**, Box plots displaying the variation of GC ratio containing in all random (in Black), Nsun2 (in Red) and m<sup>5</sup>C peaks (in Green).  $P$  values were determined by two-way Mann-Whitney U test and only value between  $Q1-1.5 \times IQR$  and  $Q3+1.5 \times IQR$  has been shown in boxplot. **d**, The distribution of Nsun2 (in Red) and m<sup>5</sup>C peaks (in Green) along mRNA 5'UTR, CDS and 3'UTR. **e**, Venn plot showing the overlay between Nsun2 targets and m<sup>5</sup>C genes. **f**, Venn diagram displaying the overlay between down-regulated genes and Nsun2 targets with m<sup>5</sup>C. **g**, Pie plot showing the ratio of RORyt targets among the genes which were Nsun2 targets with m<sup>5</sup>C and were also down-regulated upon Nsun2 depletion. **h**, IGV tracks displaying ATAC-seq, RoRyt ChIP-seq (GSE40918), mRNA-seq, Nsun2 RIP-seq (IP and input) and m<sup>5</sup>C MeRIP-seq (IP and input) enrichment near *Ill17f*. All data are representative of two independent experiments.

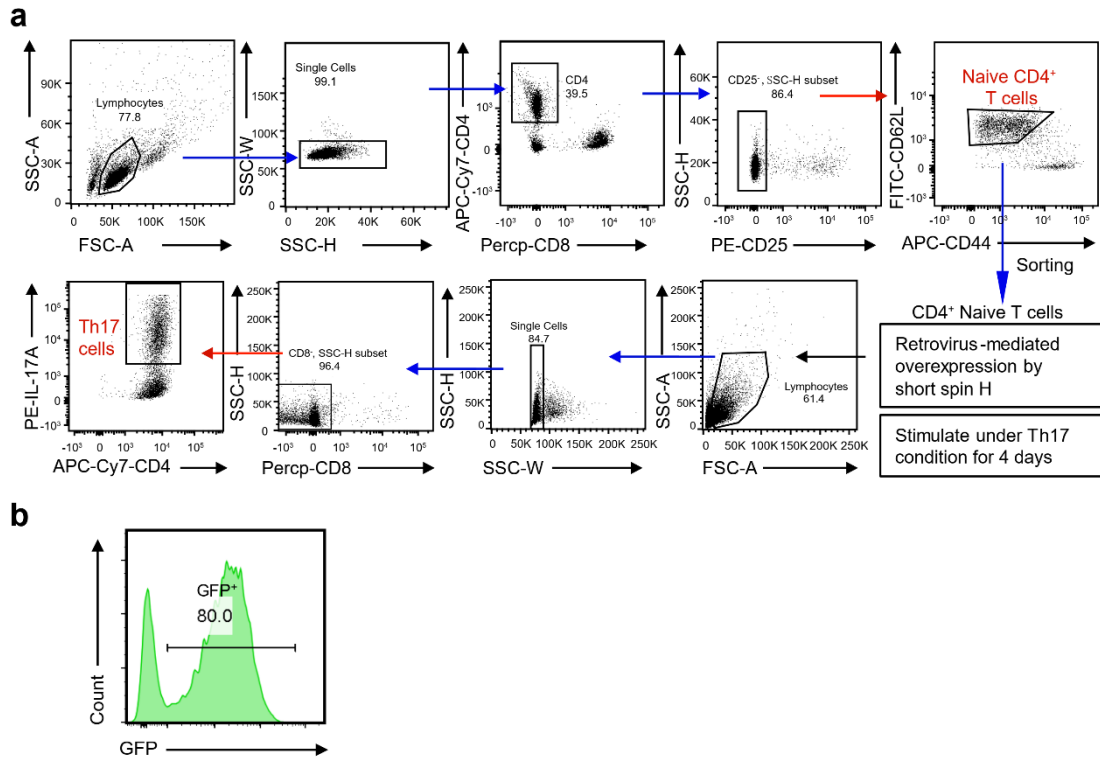

**Supplementary Fig. 10 | Nsun2-mediated m<sup>5</sup>C modification is required for Th17 generation.**

**a**, Gating strategy for retrovirus-mediated gene overexpression and Th17 *in vitro* differentiation, and related to Fig. 3e and f. **b**, Flow cytometry analysis showed the infected efficiency of retrovirus in Th17 cells. Data shown is representative of four independent experiments.

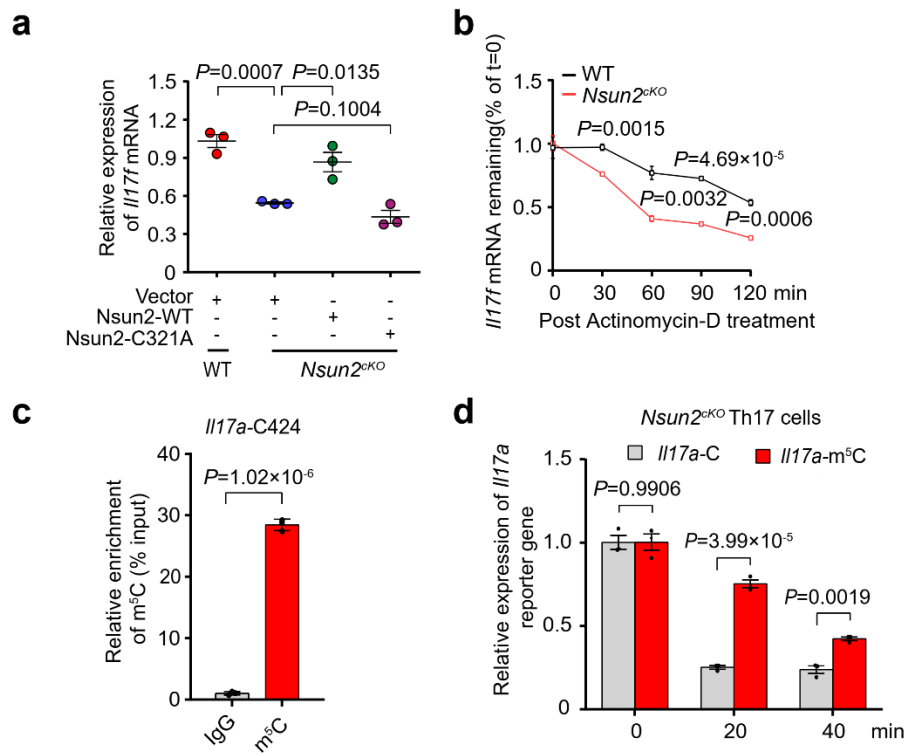

**Supplementary Fig. 11 | Nsun2 controls Th17 associated mRNA stability through marking with m<sup>5</sup>C modification.**

**a**, The mRNA level of *Il17f* in Th17 cells of rescuing Nsun2-WT, Nsun2-C321A, and Vector in were detected by RT-qPCR ( $n = 3$  per group). **b**, The half-lives of *Il17f* in wild-type and *Nsun2<sup>cKO</sup>* were detected by RT-qPCR ( $n = 3$  per group). Sorted naïve CD4<sup>+</sup> T cells from wild-type and *Nsun2<sup>cKO</sup>* mice respectively were induced under Th17-inducing condition for 4 days, and inhibiting RNA transcription in Th17 cells by treating with Actinomycin D, and harvesting the cells as indicated times (0, 20, and 40 min). The residual RNAs were normalized to 0 min. **c**, m<sup>5</sup>C MeRIP-qPCR analysis results showing the 424 cytosine site of *Il17a* marks m<sup>5</sup>C modification ( $n = 3$  per group). **d**, The RNA abundance of the *Il17a-m<sup>5</sup>C* (in Red) and *Il17a-C* (in Black) reporter in *Nsun2<sup>cKO</sup>* Th17 cells were detected by RT-qPCR and normalized to the value at 0 min ( $n = 3$  per group). Gapdh served as an internal RNA control. All data are two independent experiments.  $P$  values are calculated by using two-tailed unpaired Student's  $t$ -test (**a-d**). Error bars represent mean  $\pm$  s.e.m. Source data are provided as a Source Data file.

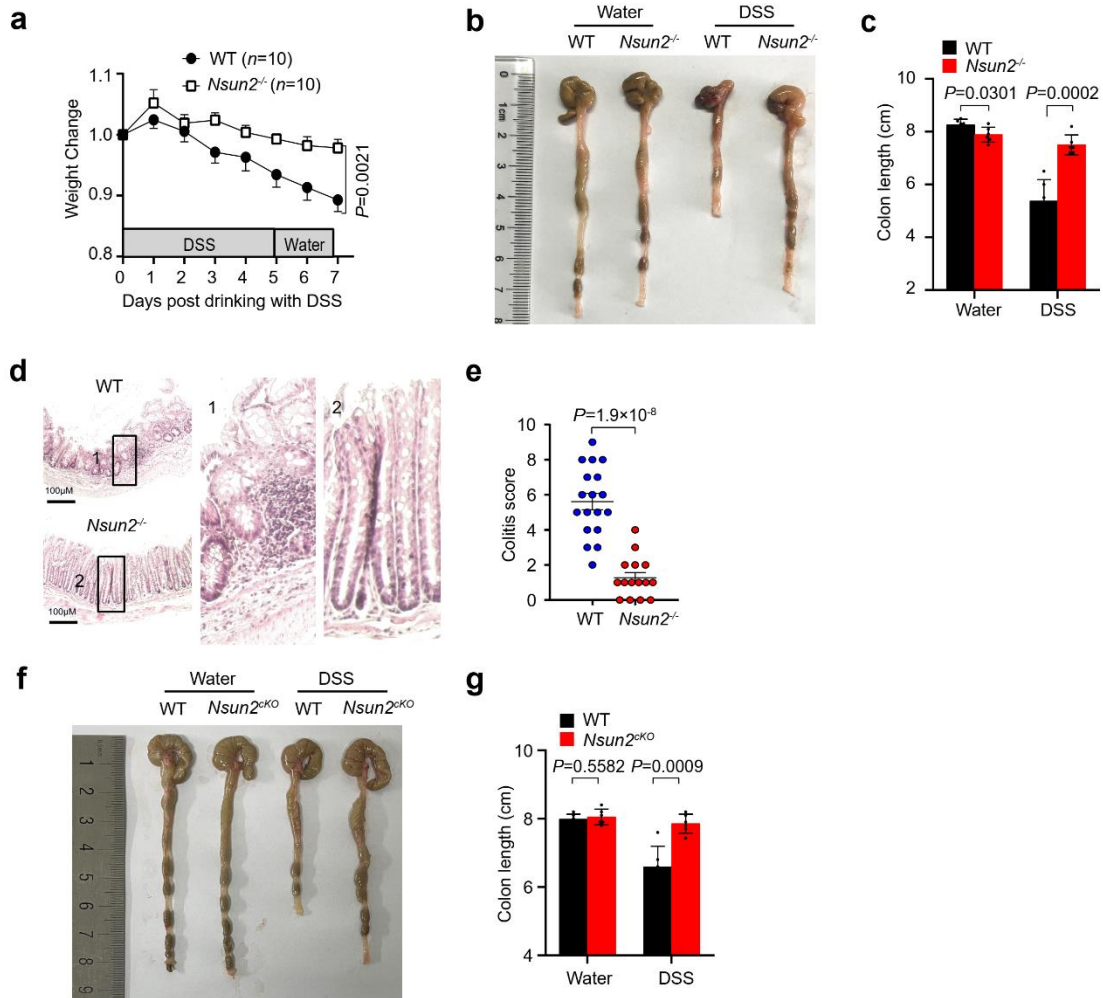

**Supplementary Fig. 12 | *Nsun2* deficiency ameliorates inflammations.**

**a-e**, The phenotype of wild-type and *Nsun2*<sup>-/-</sup> mice under DSS-induced. Littermate wild-type and *Nsun2*<sup>-/-</sup> mice were treated with 3% DSS in drinking water. The body weight changes (**a**), representative macrograph of colons (**b**), summary of colon length ( $n = 6$  per group) (**c**), hematoxylin-eosin staining indicated the severity of colons damage and inflammatory infiltration (Scale bar, 100 μm) (**d**), and colitis score ( $n = 18$  images for WT and  $n = 15$  images *Nsun2*<sup>-/-</sup>) (**e**). **f, g**, The representative macrograph of colons compared between wild-type and *Nsun2*<sup>cKO</sup> mice before or after DSS treatment, and summary of colon length ( $n = 6$  per group) (**g**). All data are at least two independent experiments.  $P$  values are calculated by two-tailed unpaired Student's  $t$ -test (**a, c, e and g**). Error bars represent mean  $\pm$  s.e.m. Source data are provided as a Source Data file.



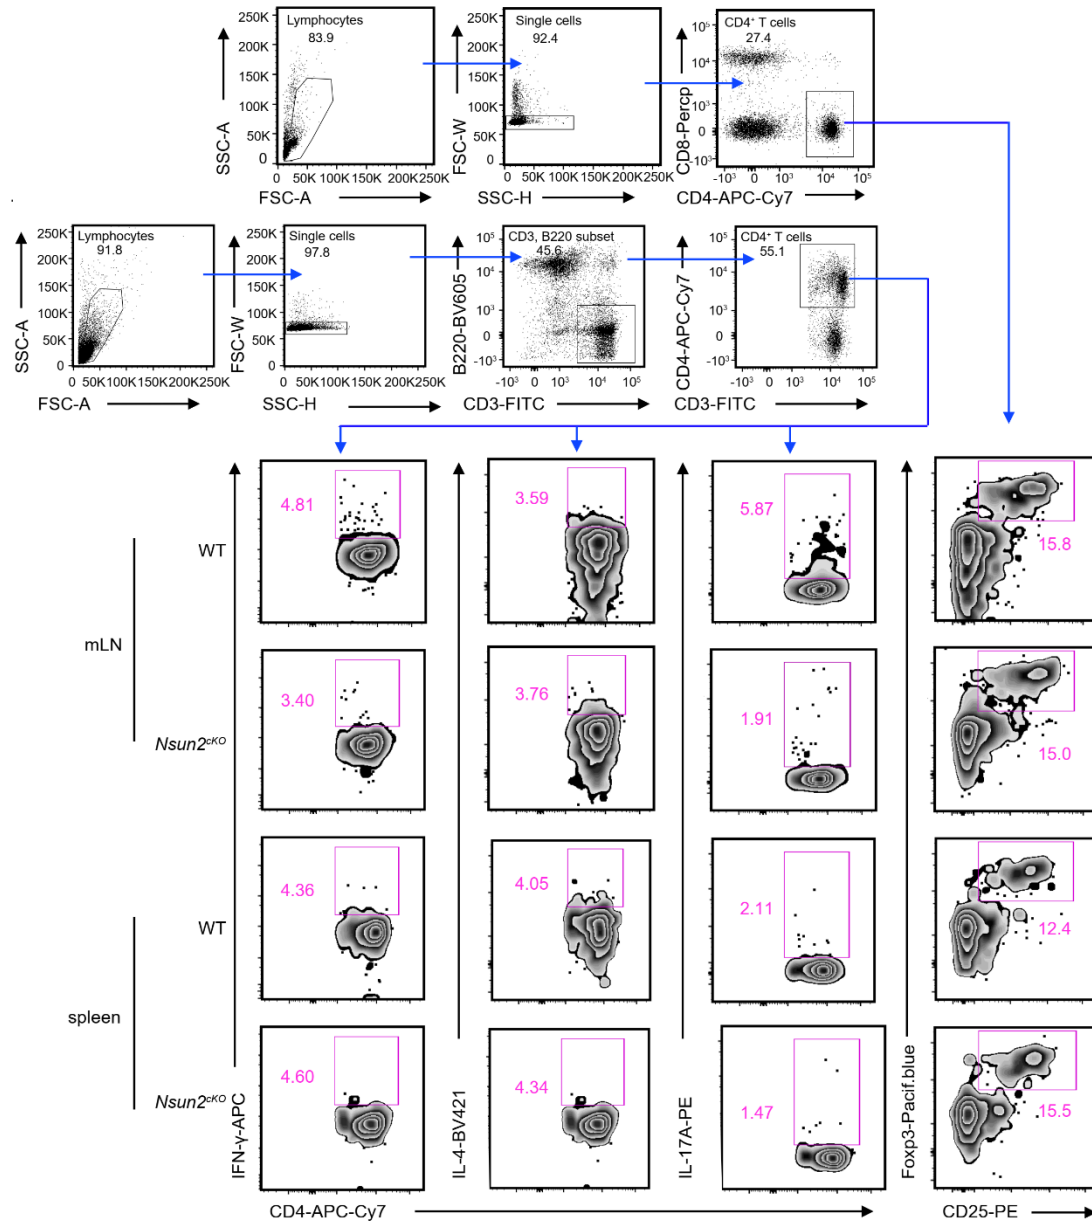

**Supplementary Fig. 13 | *Nsun2* deficiency ameliorates DSS-induced colitis.**

Gating strategies related to Fig. 4d-g. The flow cytometry analysis of T subsets in mesenteric lymph nodes and spleen.



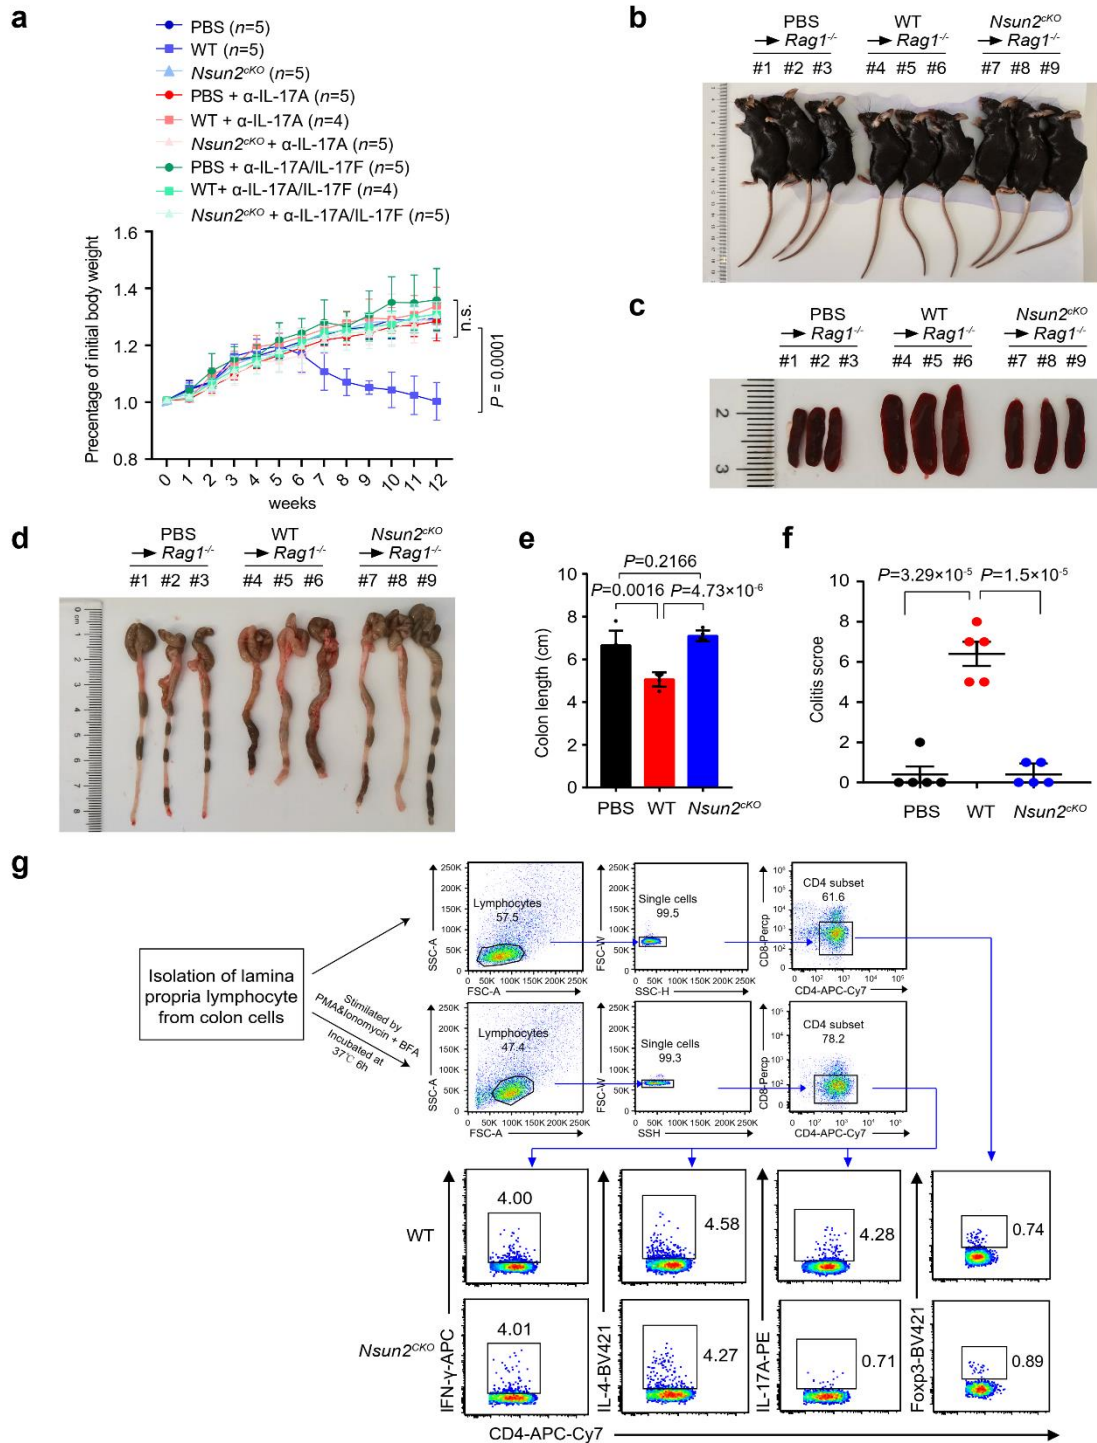

**Supplementary Fig. 14 |  $Nsun2^{cKO}$  naïve T cells does not promote disease in CD45RB<sup>hi</sup> adoptive transfer colitis mouse model.**

**a**, The body weight changes of  $Rag1^{-/-}$  host mice transferred with wild-type and  $Nsun2^{cKO}$  naïve CD45RB<sup>hi</sup> T cell, followed by the treatment (two times per week) with neutralizing antibody of IL-17A alone or IL-17A plus IL-17F. **b-h**, The phenotype of wild-type ( $n = 5$ ) and  $Nsun2^{cKO}$  ( $n = 5$ ) naïve T cell adoptively transferring into  $Rag1^{-/-}$  recipient mice. The representative macrograph of mice (**b**), representative image of spleens (**c**) and colons (**d**), colon length ( $n = 5$  per group) (**e**), colitis score ( $n = 5$  per group) (**f**). **g**. The representative FACS profiles of IFN $\gamma^+$

CD4<sup>+</sup> T, IL-4<sup>+</sup> CD4<sup>+</sup> T, IL-17A<sup>+</sup> CD4<sup>+</sup> T and Foxp3<sup>+</sup> CD4<sup>+</sup> T cells frequency in colonic lamina propria CD4<sup>+</sup> T cells from recipient mice transferring CD4<sup>+</sup>CD25<sup>-</sup>CD45Rb<sup>hi</sup> naïve T cells of wild-type or *Nsun2*<sup>cko</sup> mice (Gating strategy related to Fig. 4k). PBS vehicle injection was used as control. *n* = number of biological replicates. *P* values are calculated by using two-tailed unpaired Student's *t*-test (**a**, **e** and **f**). Error bars represent mean ± s.e.m. Source data are provided as a Source Data file.



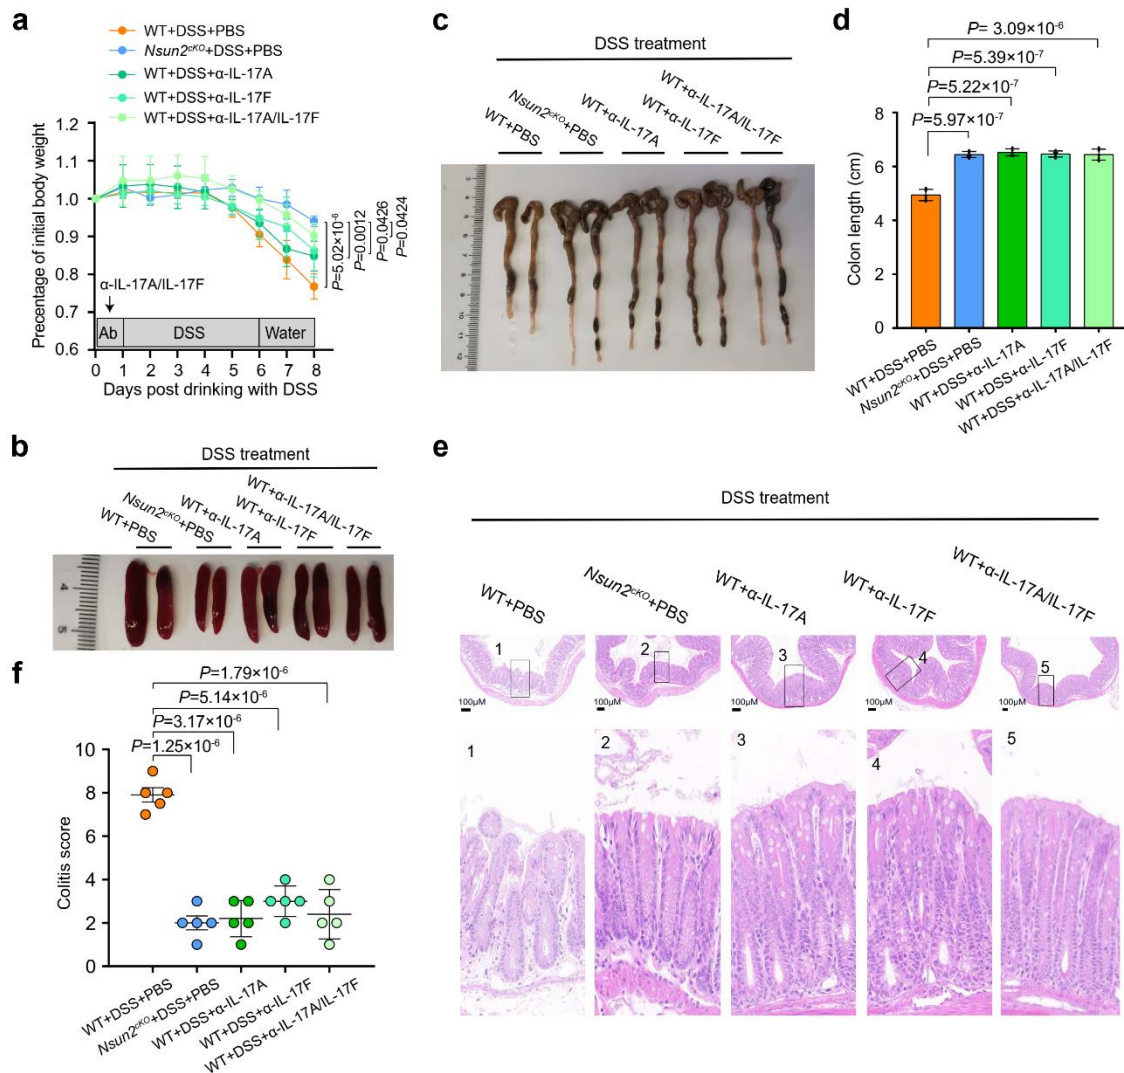

**Supplementary Fig. 16 | Neutralization of IL-17A and IL-17F alleviates the colitis development in DSS-induced mice.**

**a-f**, The wild-type ( $n = 5$ ) and *Nsun2*<sup>CKO</sup> ( $n = 5$ ) mice were treated with 3% DSS in drinking water after blockage of IL-17A (250 μg/mouse) or IL-17F (250 μg/mouse) alone, or both IL-17A (250 μg/mouse) and IL-17F (250 μg/mouse) signaling via antibodies. Five mice were used in each group. Body weight changes (**a**), representative macrograph of spleens (**b**) and colons (**c**), the colon length ( $n = 5$  mice per group) (**d**), hematoxylin-eosin staining indicated the severity of colons damage and inflammatory infiltration (Scale bar, 100 μm) (**e**), and colitis score ( $n = 5$  mice per group) (**f**).  $n =$  number of biological replicates.  $P$  values are calculated by using two-tailed unpaired Student's  $t$ -test (**a**, **d** and **f**). Error bars represent mean  $\pm$  s.e.m. Source data are provided as a Source Data file.

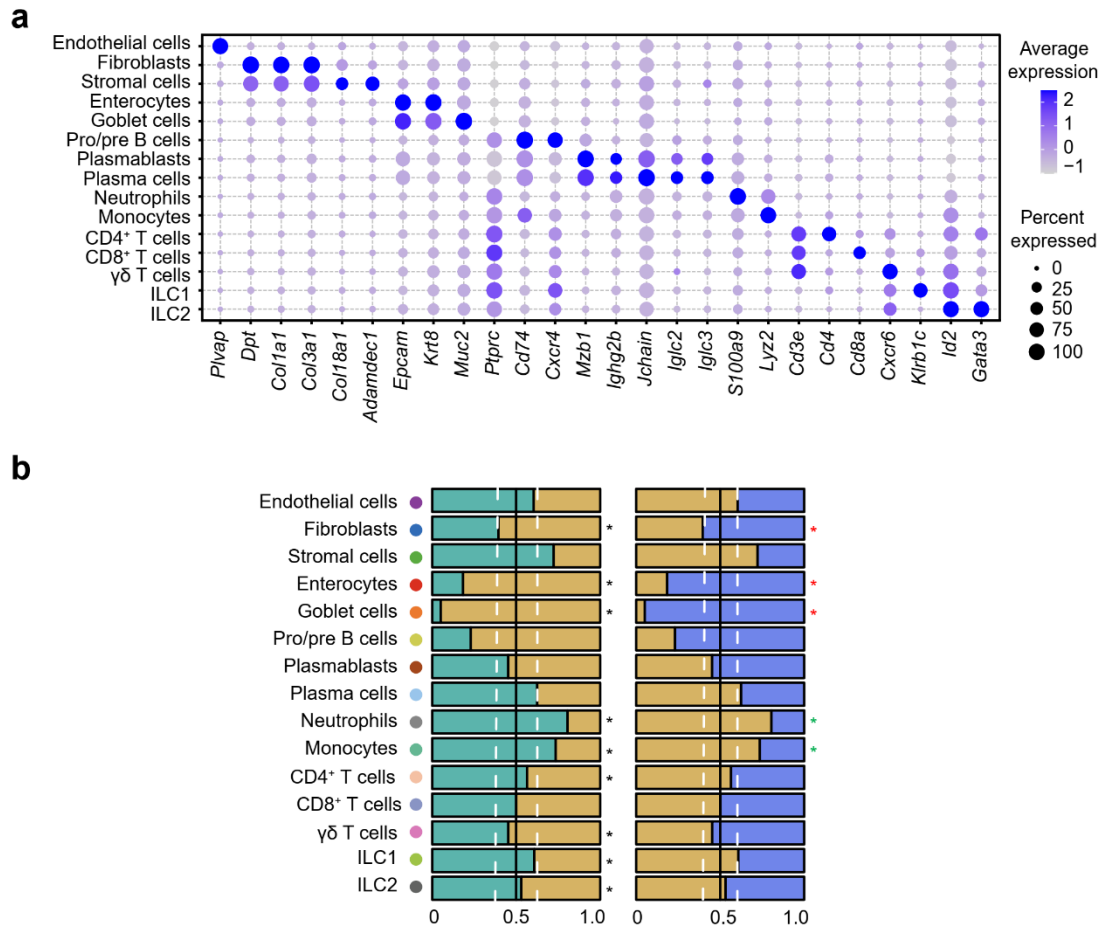

**Supplementary Fig. 17 | Characterization of clusters was identified by single cell RNA-seq.**

**a**, Bubble plot showing the average expression and the percentage of expressed cells for markers in each cell type. **b**, Barplots showing the proportion of cell types across WT+H<sub>2</sub>O (in Green), WT+DSS (in Gold) and *Nsun2*<sup>eKO</sup>+DSS treatments. The aberrantly changed cell types during colitis were marked with black asterisk (left). In colitis, the rescued increased cell types upon *Nsun2* deletion were marked with red asterisk, the rescued decreased cell types were marked with green asterisk (right).

## **Supplementary Data**

### **Supplementary Data 1**

Protein list for the Nsun2 immunoprecipitation and mass spectrometric analyses.

### **Supplementary Data 2**

A summary of ATAC-seq information in this study.

### **Supplementary Data 3**

A summary of mRNA-seq, caRNA-seq, m<sup>5</sup>C MeRIP-seq, and Nsun2 RIP-seq information in this study.

### **Supplementary Data 4**

A summary of single cell RNA-seq information in this study.

### **Supplementary Data 5**

A summary of antibodies and reagents information used in this study.

### **Supplementary Data 6**

A summary of plasmids information in this study.

### **Supplementary Data 7**

A summary of primers and reporter genes sequence information in this study.
