# Supplementary material for: Nsun2 coupling with RoRγt shapes the fate of Th17 cells and promotes colitis
Source: PubMed Central journal article supplement (PMC9932167; doi:10.1038/s41467-023-36595-w), 2023-02-16
Supplement: 41467_2023_36595_MOESM3_ESM.pdf [file 41467_2023_36595_MOESM3_ESM.pdf]

## **Description of Additional Supplementary Files**

**File name: Supplementary Data 1**

**Description:** Proteins list for the Nsun2 immunoprecipitation and mass spectrometric analyses.

**File name: Supplementary Data 2**

**Description:** A summary of ATAC-seq information in this study.

**File name: Supplementary Data 3**

**Description:** A summary of mRNA-seq, caRNA-seq, m<sup>5</sup>C MeRIP-seq, and Nsun2 RIP-seq information in this study.

**File name: Supplementary Data 4**

**Description:** A summary of single cell RNA-seq information in this study.

**File name: Supplementary Data 5**

**Description:** A summary of antibodies and reagents information used in this study.

**File name: Supplementary Data 6**

**Description:** A summary of plasmids information in this study.

**File name: Supplementary Data 7**

**Description:** A summary of primers and reporter genes sequence information in this study.
