# Supplementary material for: Nsun2 coupling with RoRγt shapes the fate of Th17 cells and promotes colitis
Source: PubMed Central journal article supplement (PMC9932167; doi:10.1038/s41467-023-36595-w), 2023-02-16
Supplement: 41467_2023_36595_MOESM11_ESM.pdf [file 41467_2023_36595_MOESM11_ESM.pdf]

## Reporting Summary

Nature Portfolio wishes to improve the reproducibility of the work that we publish. This form provides structure for consistency and transparency in reporting. For further information on Nature Portfolio policies, see our [Editorial Policies](#) and the [Editorial Policy Checklist](#).

### Statistics

For all statistical analyses, confirm that the following items are present in the figure legend, table legend, main text, or Methods section.

n/a Confirmed

- The exact sample size ( $n$ ) for each experimental group/condition, given as a discrete number and unit of measurement
- A statement on whether measurements were taken from distinct samples or whether the same sample was measured repeatedly
- The statistical test(s) used AND whether they are one- or two-sided  
*Only common tests should be described solely by name; describe more complex techniques in the Methods section.*
- A description of all covariates tested
- A description of any assumptions or corrections, such as tests of normality and adjustment for multiple comparisons
- A full description of the statistical parameters including central tendency (e.g. means) or other basic estimates (e.g. regression coefficient) AND variation (e.g. standard deviation) or associated estimates of uncertainty (e.g. confidence intervals)
- For null hypothesis testing, the test statistic (e.g.  $F$ ,  $t$ ,  $r$ ) with confidence intervals, effect sizes, degrees of freedom and  $P$  value noted  
*Give  $P$  values as exact values whenever suitable.*
- For Bayesian analysis, information on the choice of priors and Markov chain Monte Carlo settings
- For hierarchical and complex designs, identification of the appropriate level for tests and full reporting of outcomes
- Estimates of effect sizes (e.g. Cohen's  $d$ , Pearson's  $r$ ), indicating how they were calculated

*Our web collection on [statistics for biologists](#) contains articles on many of the points above.*

### Software and code

Policy information about [availability of computer code](#)

|                 |                                                                                                                                                                                                                                                                                                                                                                                                                                                                                                                                                                                                                                                                                                                                                                                                                                                                                                                                                                                                                                                                                                                                                                                                                                                                                                                                                                                                                                                                                                                                                                                                                                                                                                                                                                                                                 |
|-----------------|-----------------------------------------------------------------------------------------------------------------------------------------------------------------------------------------------------------------------------------------------------------------------------------------------------------------------------------------------------------------------------------------------------------------------------------------------------------------------------------------------------------------------------------------------------------------------------------------------------------------------------------------------------------------------------------------------------------------------------------------------------------------------------------------------------------------------------------------------------------------------------------------------------------------------------------------------------------------------------------------------------------------------------------------------------------------------------------------------------------------------------------------------------------------------------------------------------------------------------------------------------------------------------------------------------------------------------------------------------------------------------------------------------------------------------------------------------------------------------------------------------------------------------------------------------------------------------------------------------------------------------------------------------------------------------------------------------------------------------------------------------------------------------------------------------------------|
| Data collection | For RNA-seq, RNA-BisSeq, ATAC-seq, Nsun2 RIP-seq, m5C MeRIP-seq and caRNA-seq, Sequencing was performed on an Illumina HiSeq X-Ten sequencing system with paired end 150 bp read length. RT-qPCR data was performed on Agilent Technologies AriaMx Real-Time PCR System. FASC data was performed by BD LSRFortessa.                                                                                                                                                                                                                                                                                                                                                                                                                                                                                                                                                                                                                                                                                                                                                                                                                                                                                                                                                                                                                                                                                                                                                                                                                                                                                                                                                                                                                                                                                             |
| Data analysis   | For mRNA-seq and caRNA-seq of wild-type and Nsun2cKO mice, adaptor sequences were trimmed off for all raw reads using the Cutadapt (version 1.13)(DOI: <a href="https://doi.org/10.14806/ej.17.1.200">https://doi.org/10.14806/ej.17.1.200</a> ). Reads with length less than 35 nt or contained an ambiguous nucleotide were discarded by Trimmomatic (version 0.36)(PMID: 24695404). For Nsun2 RIP-seq, m5C MeRIP-seq and their associated input samples, the first three nucleotides of the second sequencing read which derived from the SMART adapter (SMARTer Stranded Total RNA-Seq Kit version 2) was trimmed using Cutadapt with parameter '-U 3'. For ATAC-seq, all reads were aligned to mm10 using Bowtie2 (version 7.3.0) with the parameters '-t -q -N 1 -L 25 -X 2000 --no-mixed --no-discordant'. ChIP-seq reads were aligned to mm10 with the parameters '-t -q -N 1 -L 25'. All unmapped reads, non-uniquely mapped reads and PCR duplicates were removed. In addition, as the regions of open chromatin of interest are usually located in the nuclear genome, mitochondrial reads from ATAC-seq were also discarded. Peaks of NSUN2 RIP-seq and m5C RIP-seq were called using MACS2 program with default options except for '--nomodel'. The peaks were annotated based on Ensembl (release 68) gene annotation information by applying BEDTools' intersectBed. For scRNA-seq, reads were demultiplexed and mapped to mm10 through Cellranger toolkit (version 2.1.0, 10x Genomics) to generate digital gene expression matrices. Subsequent analysis was performed with R package Seurat v3 (PMID: 31178118). For graph drawing and P value calculation of RT-qPCR data and other phenotype data statistics were applied by Graph Prism7.0. FASC data analysis by using FlowJo X 10.0.7r2. |

For manuscripts utilizing custom algorithms or software that are central to the research but not yet described in published literature, software must be made available to editors and reviewers. We strongly encourage code deposition in a community repository (e.g. GitHub). See the Nature Portfolio [guidelines for submitting code & software](#) for further information.

## Data

Policy information about [availability of data](#)

All manuscripts must include a [data availability statement](#). This statement should provide the following information, where applicable:

- Accession codes, unique identifiers, or web links for publicly available datasets
- A description of any restrictions on data availability
- For clinical datasets or third party data, please ensure that the statement adheres to our [policy](#)

The ATAC-seq, Nsun2 RIP-seq, m5C MeRIP-seq, caRNA-seq, mRNA-seq and scRNA-seq data generated in this study have been deposited in Genome Sequence Archive of National Genomics Data Center under accession code CRA005161 (linked to the BioProject with accession No PRJCA006795) (<https://ngdc.cncb.ac.cn/search/?dbld=gsa&q=PRJCA006795>). The mass spectrometry data of Nsun2-IP have been deposited in the PeptideAtlas with accession number PASS01711. Source data are provided with this paper.

## Field-specific reporting

Please select the one below that is the best fit for your research. If you are not sure, read the appropriate sections before making your selection.

Life sciences  Behavioural & social sciences  Ecological, evolutionary & environmental sciences

For a reference copy of the document with all sections, see [nature.com/documents/nr-reporting-summary-flat.pdf](https://www.nature.com/documents/nr-reporting-summary-flat.pdf)

## Life sciences study design

All studies must disclose on these points even when the disclosure is negative.

|                 |                                                                                                                                                                                                                                                                                                                                                                    |
|-----------------|--------------------------------------------------------------------------------------------------------------------------------------------------------------------------------------------------------------------------------------------------------------------------------------------------------------------------------------------------------------------|
| Sample size     | Sample size was not predetermined but we performed experiments with group sizes based on existing published literature of similar experiments. For animal experiments, $n \geq 3$ was chosen based on the previous publications in the field (Li et al. Nature, 2017; Yao et al. Nat. Commun, 2021; Zhang et al. Nature, 2020; O'Connor et al. Nat Immunol, 2009). |
| Data exclusions | No data were excluded from analysis.                                                                                                                                                                                                                                                                                                                               |
| Replication     | All experiments were performed in this manuscript at least two times independent biological replicates. All attempt to reproduce the results were successful.                                                                                                                                                                                                      |
| Randomization   | For animal studies. age and sex matched animals were assigned randomly to each experimental and control group where applicable.                                                                                                                                                                                                                                    |
| Blinding        | Investigators were not blinded to group allocation during data collection. And there was no blinding in analysis is of the experiment a data base on experiment types (without subjective estimation, e.g. flow cytometry, realtime PCR machine, etc). Other experimental techniques were not blinded.                                                             |

## Behavioural & social sciences study design

All studies must disclose on these points even when the disclosure is negative.

|                   |                                                                                                                                                                                                                                                                                                                                                                                                                                                                                 |
|-------------------|---------------------------------------------------------------------------------------------------------------------------------------------------------------------------------------------------------------------------------------------------------------------------------------------------------------------------------------------------------------------------------------------------------------------------------------------------------------------------------|
| Study description | Briefly describe the study type including whether data are quantitative, qualitative, or mixed-methods (e.g. qualitative cross-sectional, quantitative experimental, mixed-methods case study).                                                                                                                                                                                                                                                                                 |
| Research sample   | State the research sample (e.g. Harvard university undergraduates, villagers in rural India) and provide relevant demographic information (e.g. age, sex) and indicate whether the sample is representative. Provide a rationale for the study sample chosen. For studies involving existing datasets, please describe the dataset and source.                                                                                                                                  |
| Sampling strategy | Describe the sampling procedure (e.g. random, snowball, stratified, convenience). Describe the statistical methods that were used to predetermine sample size OR if no sample-size calculation was performed, describe how sample sizes were chosen and provide a rationale for why these sample sizes are sufficient. For qualitative data, please indicate whether data saturation was considered, and what criteria were used to decide that no further sampling was needed. |
| Data collection   | Provide details about the data collection procedure, including the instruments or devices used to record the data (e.g. pen and paper, computer, eye tracker, video or audio equipment) whether anyone was present besides the participant(s) and the researcher, and whether the researcher was blind to experimental condition and/or the study hypothesis during data collection.                                                                                            |
| Timing            | Indicate the start and stop dates of data collection. If there is a gap between collection periods, state the dates for each sample cohort.                                                                                                                                                                                                                                                                                                                                     |
| Data exclusions   | If no data were excluded from the analyses, state so OR if data were excluded, provide the exact number of exclusions and the rationale behind them, indicating whether exclusion criteria were pre-established.                                                                                                                                                                                                                                                                |

|                   |                                                                                                                                                                                                         |
|-------------------|---------------------------------------------------------------------------------------------------------------------------------------------------------------------------------------------------------|
| Non-participation | State how many participants dropped out/declined participation and the reason(s) given OR provide response rate OR state that no participants dropped out/declined participation.                       |
| Randomization     | If participants were not allocated into experimental groups, state so OR describe how participants were allocated to groups, and if allocation was not random, describe how covariates were controlled. |

## Ecological, evolutionary & environmental sciences study design

All studies must disclose on these points even when the disclosure is negative.

|                                   |                                                                                                                                                                                                                                                                                                                                                                                                                                                         |
|-----------------------------------|---------------------------------------------------------------------------------------------------------------------------------------------------------------------------------------------------------------------------------------------------------------------------------------------------------------------------------------------------------------------------------------------------------------------------------------------------------|
| Study description                 | Briefly describe the study. For quantitative data include treatment factors and interactions, design structure (e.g. factorial, nested, hierarchical), nature and number of experimental units and replicates.                                                                                                                                                                                                                                          |
| Research sample                   | Describe the research sample (e.g. a group of tagged <i>Passer domesticus</i> , all <i>Stenocereus thurberi</i> within Organ Pipe Cactus National Monument), and provide a rationale for the sample choice. When relevant, describe the organism taxa, source, sex, age range and any manipulations. State what population the sample is meant to represent when applicable. For studies involving existing datasets, describe the data and its source. |
| Sampling strategy                 | Note the sampling procedure. Describe the statistical methods that were used to predetermine sample size OR if no sample-size calculation was performed, describe how sample sizes were chosen and provide a rationale for why these sample sizes are sufficient.                                                                                                                                                                                       |
| Data collection                   | Describe the data collection procedure, including who recorded the data and how.                                                                                                                                                                                                                                                                                                                                                                        |
| Timing and spatial scale          | Indicate the start and stop dates of data collection, noting the frequency and periodicity of sampling and providing a rationale for these choices. If there is a gap between collection periods, state the dates for each sample cohort. Specify the spatial scale from which the data are taken                                                                                                                                                       |
| Data exclusions                   | If no data were excluded from the analyses, state so OR if data were excluded, describe the exclusions and the rationale behind them, indicating whether exclusion criteria were pre-established.                                                                                                                                                                                                                                                       |
| Reproducibility                   | Describe the measures taken to verify the reproducibility of experimental findings. For each experiment, note whether any attempts to repeat the experiment failed OR state that all attempts to repeat the experiment were successful.                                                                                                                                                                                                                 |
| Randomization                     | Describe how samples/organisms/participants were allocated into groups. If allocation was not random, describe how covariates were controlled. If this is not relevant to your study, explain why.                                                                                                                                                                                                                                                      |
| Blinding                          | Describe the extent of blinding used during data acquisition and analysis. If blinding was not possible, describe why OR explain why blinding was not relevant to your study.                                                                                                                                                                                                                                                                           |
| Did the study involve field work? | <input type="checkbox"/> Yes <input checked="" type="checkbox"/> No                                                                                                                                                                                                                                                                                                                                                                                     |

## Reporting for specific materials, systems and methods

We require information from authors about some types of materials, experimental systems and methods used in many studies. Here, indicate whether each material, system or method listed is relevant to your study. If you are not sure if a list item applies to your research, read the appropriate section before selecting a response.

### Materials & experimental systems

|                                     |                                                                 |
|-------------------------------------|-----------------------------------------------------------------|
| n/a                                 | Involved in the study                                           |
| <input type="checkbox"/>            | <input checked="" type="checkbox"/> Antibodies                  |
| <input type="checkbox"/>            | <input checked="" type="checkbox"/> Eukaryotic cell lines       |
| <input checked="" type="checkbox"/> | <input type="checkbox"/> Palaeontology and archaeology          |
| <input type="checkbox"/>            | <input checked="" type="checkbox"/> Animals and other organisms |
| <input checked="" type="checkbox"/> | <input type="checkbox"/> Human research participants            |
| <input checked="" type="checkbox"/> | <input type="checkbox"/> Clinical data                          |
| <input checked="" type="checkbox"/> | <input type="checkbox"/> Dual use research of concern           |

### Methods

|                                     |                                                    |
|-------------------------------------|----------------------------------------------------|
| n/a                                 | Involved in the study                              |
| <input checked="" type="checkbox"/> | <input type="checkbox"/> ChIP-seq                  |
| <input type="checkbox"/>            | <input checked="" type="checkbox"/> Flow cytometry |
| <input checked="" type="checkbox"/> | <input type="checkbox"/> MRI-based neuroimaging    |

### Antibodies

|                 |                                                                                                                                                                                                                                                                                                                                                                                                                                                                                             |
|-----------------|---------------------------------------------------------------------------------------------------------------------------------------------------------------------------------------------------------------------------------------------------------------------------------------------------------------------------------------------------------------------------------------------------------------------------------------------------------------------------------------------|
| Antibodies used | anti-CD25-PE antibody (1:200; Biolegend; Cat.102007);<br>anti-B220-BV711 antibody (1:200; Biolegend; Cat.103241);<br>anti-CD8-Percp-Cy5.5 antibody (1:200; Biolegend; Cat.100734);<br>anti-CD4-APC-Cy7 antibody (1:200; Biolegend; Cat.100413);<br>anti-CD4-FITC antibody (1:200; Biolegend; Cat.100406);<br>anti-IL-4-BV421 antibody (1:200; Biolegend; Cat.504127);<br>anti-CD62L-FITC antibody (1:200; Biolegend; Cat.104405);<br>anti-CD11b-PE antibody (1:200; Biolegend; Cat.101207); |
|-----------------|---------------------------------------------------------------------------------------------------------------------------------------------------------------------------------------------------------------------------------------------------------------------------------------------------------------------------------------------------------------------------------------------------------------------------------------------------------------------------------------------|

anti- Ki67-PE antibody (1:200; Biolegend; Cat.151209);  
 anti-IL-17A-PE antibody (1:200; Biolegend; Cat.506904);  
 anti-IFN- $\gamma$ -APC antibody (1:200; Biolegend; Cat.505810);  
 anti-CD45.2-AF700 antibody (1:200; Biolegend; Cat.109822);  
 anti-Foxp3-Pacific blue antibody (1:200; Biolegend; Cat.126409);  
 anti-CD3-FITC antibody (1:200; Biolegend; Cat.100203);  
 anti-RoRyt-APC antibody (1:200; eBioscience; Cat.17-6988-80);  
 anti-CD44-APC antibody (1:200; eBioscience; Cat. 17-0441-81);  
 anti-Active Caspase-3-FITC antibody (1:200; BD; Cat.560901);  
 anti-NSUN2 antibody (1:1000 for WB,1:50 for IP; Proteintech; Cat.20854-1-AP);  
 anti-Gapdh antibody (1:2000; CST; Cat.5174S);  
 anti-Myc-tag antibody (1:2000; Sigma-Aldrich; Cat.C3956);  
 anti-Flag-tag antibody (1:2000; Sigma-Aldrich; Cat.F7425);  
 anti-GST antibody (1:2000; GenScript; Cat.A00865);  
 anti-GFP antibody (1:2000; CST; Cat.2956S);  
 anti-RoRyt antibody (1:1000; Santa cruz; Cat.sc-293150);  
 anti-mouse-IL-17A inVivoPlus antibody (250  $\mu$ g/mouse; Bioxcell; Cat.BP0173);  
 anti-mouse-IL-17F inVivoPlus antibody (250  $\mu$ g/mouse; Bioxcell; Cat.BE0303);  
 anti-5-methylcytosine [33D3] antibody (1:50; Abcam; Cat.ab10805);  
 anti-mouse CD3 antibody (2  $\mu$ g/ml Bioxcell; Cat.BE0002);  
 anti-mouse CD28 antibody (1  $\mu$ g/ml Bioxcell; Cat.BE0015-1);  
 anti-mouse IL-4 antibody (10  $\mu$ g/ml BioLegend; Cat.504101);  
 anti-IFN- $\gamma$  antibody (10  $\mu$ g/ml; Biolegend; Cat. 505843).

## Validation

Similar results with validation results on manufacturer's website or relevant citations.

Anti-CD25-PE antibody (1:200; Biolegend; Cat.102007, Rat IgG1, FC, Jayachandran R, et al.,2019 (PMID: 30611611));  
 anti-B220-BV711 antibody (1:200; Biolegend; Cat.103241, Rat IgG2a, FC, Giampazolias E, et al. 2021 (PMID: 34081922) );  
 anti-CD8-Percp-Cy5.5 antibody (1:200; Biolegend; Cat.100734, Rat IgG2a, FC, White JP et al. 2018 (PMID: 30293866));  
 anti-CD4-APC-Cy7 antibody (1:200; Biolegend; Cat.100413, Rat IgG2b, FC, Sade-Feldman M, et al. 2018 (PMID: 30388456));  
 anti-CD4-FITC antibody (1:200; Biolegend; Cat.100406, Rat IgG2b, FC, Ramanan D, et al. 2020 (PMID: 32402238));  
 anti-IL-4-BV421 antibody (1:200; Biolegend; Cat.504127, Rat IgG1, FC, Yang J, et al. 2020 (PMID: 32726802));  
 anti-CD62L-FITC antibody (1:200; Biolegend; Cat.104405, Rat IgG2a, FC, Wu J et al. 2017, (PMID: 29221730));  
 anti-CD11b-PE antibody (1:200; Biolegend; Cat.101207, Rat IgG2b, FC, Wang C, et al. 2017, (PMID: 28978693));  
 anti- Ki67-PE antibody (1:200; Biolegend; Cat.151209, Rat IgG2b, FC, Mogilenko DA, et al. 2020, (PMID: 33271118);  
 anti-IL-17A-PE antibody (1:200; Biolegend; Cat.506904, Rat IgG1, FC, Bing Wu et al. 2018, (PMID: 30446383));  
 anti-IFN- $\gamma$ -APC antibody (1:200; Biolegend; Cat.505810, Rat IgG1, FC, Malik A et al. 2018, (PMID: 30231985));  
 anti-CD45.2-AF700 antibody (1:200; Biolegend; Cat.109822, Mouse (SJL) IgG2a, Hayatsu N et al. 2017, (PMID: 28778586));  
 anti-Foxp3-Pacific blue antibody (1:200; Biolegend; Cat.126409, Rat IgG2b, FACS, Kaur A, et al. 2019(PMID: 30279173));  
 anti-CD3-FITC antibody (1:200; Biolegend; Cat.100203, Rat monoclonal IgG2b,  $\kappa$ , FACS, Lee JS et al. 2018(PMID: 30100185));  
 anti-RoRyt-APC antibody (1:200; eBioscience; Cat.17-6988-80, rat IgG 2a, FACS, Segovia M et al.2019(PMID: 31085177));  
 anti-CD44-APC antibody (1:200; eBioscience; Cat. 17-0441-81, rat monoclonal IgG2b, FACS, Colunga T et al.2019(PMID: 30840882));  
 anti- Active Caspase-3-FITC antibody (1:200; BD; Cat.560901, Rabbit IgG, IF, Dai C et al.1999(PMID: 10233883));  
 anti-NSUN2 antibody (1:1000 for WB;1:50 for IP; Proteintech; Cat.20854-1-AP, Rabbit Polyclonal IgG,WB,IP, Hussain Shobbir S et al.2013(PMID: 23401851));  
 anti-GAPDH antibody (1:2000; CST; Cat.5174S, Rabbit monoclonal IgG, WB, Kenji Miki, et. al.2021(PMID: 34155205));  
 anti-Myc-tag antibody (1:2000; Sigma-Aldrich; Cat.C3956, Rabbit polyclonal IgG,WB, Na Li et al.2014(PMID:25344755));  
 anti-Flag-tag antibody (1:2000; Sigma-Aldrich; Cat.F7425, Rabbit IgG, WB, Madalina Raducu et al.2016(PMID:27234298));  
 anti-GST-Tag antibody (1:2000; GenScript; Cat.A00865, Mouse IgG1, WB, Tsai KL.,et al. 2013(PMID: 23563140));  
 anti-GFP antibody (1:2000; CST; Cat. 2956S, Rabbit IgG, WB, S.abicki M, et. al.2020 (PMID: 33208943));  
 anti-RoRyt antibody (1:1000; Santa cruz; Cat.sc-293150, Mouse IgG, WB, Lopez, D.V., et al. 2021(PMID: 34408754));  
 anti-mouse-IL-17A inVivoPlus antibody (250  $\mu$ g/mouse; Bioxcell; Cat.BP0173, Mouse IgG1,in vivo mouse model, Faraco, G., et al. 2018(PMID: 29335605));  
 anti-mouse-IL-17F inVivoPlus antibody (250  $\mu$ g/mouse; Bioxcell; Cat.BE0303, Mouse IgG1, in vivo mouse model, Marchitto, M. C., et al. 2019(PMID: 31088972));  
 anti-5-methylcytosine antibody [33D3] (1:50; Abcam; Cat.ab10805, Mouse monoclonal, IP, Yang Y et al. 2019(PMID: 31399345));  
 anti-mouse CD3 antibody (2  $\mu$ g/ml Bioxcell; Cat.BE0002, Rat IgG2b, in vitro T cell stimulation/activation, Choi, Y. S., et al. 2015 (PMID: 26214741));  
 anti-mouse CD28 antibody (1  $\mu$ g/ml Bioxcell; Cat.BE0015-1, polyclonal Syrian hamster IgG, in vitro T cell stimulation/activation, Lacher, S. M., et al.2018 (PMID: 30061013));  
 anti-mouse IL-4 antibody (10  $\mu$ g/ml BioLegend; Cat.504101, monoclonal clone 11B11 Rat IgG1, in vitro T cell stimulation/activation. Martínez-López M et al. 2019 (PMID: 30709742));  
 anti-IFN- $\gamma$  antibody (Biolegend; Cat. 505843, clone XMG1.2 Rat IgG1,  $\kappa$ , McDonald B, et al. 2020. (32810440));

## Eukaryotic cell lines

### Policy information about cell lines

#### Cell line source(s)

Th17 cell originated from mouse lymph nodes. HEK293T were purchased from ATCC. Plat.E is provided by Pengyuan Yang's lab

#### Authentication

Cell lines used in this study were authenticated with viability, morphology, karyotyping, and STR profiling by the supplier.

|                                                                      |                                                                                                                          |
|----------------------------------------------------------------------|--------------------------------------------------------------------------------------------------------------------------|
| Mycoplasma contamination                                             | All lines tested negative for mycoplasma contamination, checked monthly using the MycoBlue Mycoplasma Detector (Vazyme.) |
| Commonly misidentified lines<br>(See <a href="#">ICLAC</a> register) | No commonly misidentified lines were used.                                                                               |

## Palaeontology and Archaeology

|                                                                                                                                                 |                                                                                                                                                                                                                                                                                      |
|-------------------------------------------------------------------------------------------------------------------------------------------------|--------------------------------------------------------------------------------------------------------------------------------------------------------------------------------------------------------------------------------------------------------------------------------------|
| Specimen provenance                                                                                                                             | <i>Provide provenance information for specimens and describe permits that were obtained for the work (including the name of the issuing authority, the date of issue, and any identifying information). Permits should encompass collection and, where applicable, export.</i>       |
| Specimen deposition                                                                                                                             | <i>Indicate where the specimens have been deposited to permit free access by other researchers.</i>                                                                                                                                                                                  |
| Dating methods                                                                                                                                  | <i>If new dates are provided, describe how they were obtained (e.g. collection, storage, sample pretreatment and measurement), where they were obtained (i.e. lab name), the calibration program and the protocol for quality assurance OR state that no new dates are provided.</i> |
| <input type="checkbox"/> Tick this box to confirm that the raw and calibrated dates are available in the paper or in Supplementary Information. |                                                                                                                                                                                                                                                                                      |
| Ethics oversight                                                                                                                                | <i>Identify the organization(s) that approved or provided guidance on the study protocol, OR state that no ethical approval or guidance was required and explain why not.</i>                                                                                                        |

Note that full information on the approval of the study protocol must also be provided in the manuscript.

## Animals and other organisms

Policy information about [studies involving animals](#); [ARRIVE guidelines](#) recommended for reporting animal research

|                         |                                                                                                                                                                                                                                                                                                                                                                                                                                                                                                                                                                                                                                                                       |
|-------------------------|-----------------------------------------------------------------------------------------------------------------------------------------------------------------------------------------------------------------------------------------------------------------------------------------------------------------------------------------------------------------------------------------------------------------------------------------------------------------------------------------------------------------------------------------------------------------------------------------------------------------------------------------------------------------------|
| Laboratory animals      | 6- to 8-week-old C57BL/6J genetic background mice (both male and female) were used in this study, including, wild-type, Nsun2+/-, Nsun2-/-, Cd4-Cre, Nsun2flox/flox, and Cd4-Cre+/- Nsun2f/f mice. Rag1-/- C57BL/6J mice were used as recipients for CD45RBhi T-cell transfer colitis and purchased from GemPharmatech company at 5-week old. All mice were kept in group housing (3-5 mice per cage) in a specific pathogen-free facility with controlled environmental conditions of humidity (50±10%), lighting (a 12-h light/dark cycle) and controlled temperature (21±1°C) at animal experiment center of Institute of Biophysics, Chinese Academy of Sciences. |
| Wild animals            | The study did not involve wild animals.                                                                                                                                                                                                                                                                                                                                                                                                                                                                                                                                                                                                                               |
| Field-collected samples | The study did not involve samples collected from the wild.                                                                                                                                                                                                                                                                                                                                                                                                                                                                                                                                                                                                            |
| Ethics oversight        | All investigations involving mice were approved by the Animal Care and Use Committee of Institute of Biophysics, Chinese Academy of Sciences.                                                                                                                                                                                                                                                                                                                                                                                                                                                                                                                         |

Note that full information on the approval of the study protocol must also be provided in the manuscript.

## Human research participants

Policy information about [studies involving human research participants](#)

|                            |                                                                                                                                                                                                                                                                                                                                      |
|----------------------------|--------------------------------------------------------------------------------------------------------------------------------------------------------------------------------------------------------------------------------------------------------------------------------------------------------------------------------------|
| Population characteristics | <i>Describe the covariate-relevant population characteristics of the human research participants (e.g. age, gender, genotypic information, past and current diagnosis and treatment categories). If you filled out the behavioural &amp; social sciences study design questions and have nothing to add here, write "See above."</i> |
| Recruitment                | <i>Describe how participants were recruited. Outline any potential self-selection bias or other biases that may be present and how these are likely to impact results.</i>                                                                                                                                                           |
| Ethics oversight           | <i>Identify the organization(s) that approved the study protocol.</i>                                                                                                                                                                                                                                                                |

Note that full information on the approval of the study protocol must also be provided in the manuscript.

## Clinical data

Policy information about [clinical studies](#)

All manuscripts should comply with the ICMJE [guidelines for publication of clinical research](#) and a completed [CONSORT checklist](#) must be included with all submissions.

|                             |                                                                                                                          |
|-----------------------------|--------------------------------------------------------------------------------------------------------------------------|
| Clinical trial registration | <i>Provide the trial registration number from ClinicalTrials.gov or an equivalent agency.</i>                            |
| Study protocol              | <i>Note where the full trial protocol can be accessed OR if not available, explain why.</i>                              |
| Data collection             | <i>Describe the settings and locales of data collection, noting the time periods of recruitment and data collection.</i> |
| Outcomes                    | <i>Describe how you pre-defined primary and secondary outcome measures and how you assessed these measures.</i>          |

## Dual use research of concern

Policy information about [dual use research of concern](#)

### Hazards

Could the accidental, deliberate or reckless misuse of agents or technologies generated in the work, or the application of information presented in the manuscript, pose a threat to:

- | No                                  | Yes                                                 |
|-------------------------------------|-----------------------------------------------------|
| <input checked="" type="checkbox"/> | <input type="checkbox"/> Public health              |
| <input checked="" type="checkbox"/> | <input type="checkbox"/> National security          |
| <input checked="" type="checkbox"/> | <input type="checkbox"/> Crops and/or livestock     |
| <input checked="" type="checkbox"/> | <input type="checkbox"/> Ecosystems                 |
| <input checked="" type="checkbox"/> | <input type="checkbox"/> Any other significant area |

### Experiments of concern

Does the work involve any of these experiments of concern:

- | No                                  | Yes                                                                                                  |
|-------------------------------------|------------------------------------------------------------------------------------------------------|
| <input checked="" type="checkbox"/> | <input type="checkbox"/> Demonstrate how to render a vaccine ineffective                             |
| <input checked="" type="checkbox"/> | <input type="checkbox"/> Confer resistance to therapeutically useful antibiotics or antiviral agents |
| <input checked="" type="checkbox"/> | <input type="checkbox"/> Enhance the virulence of a pathogen or render a nonpathogen virulent        |
| <input checked="" type="checkbox"/> | <input type="checkbox"/> Increase transmissibility of a pathogen                                     |
| <input checked="" type="checkbox"/> | <input type="checkbox"/> Alter the host range of a pathogen                                          |
| <input checked="" type="checkbox"/> | <input type="checkbox"/> Enable evasion of diagnostic/detection modalities                           |
| <input checked="" type="checkbox"/> | <input type="checkbox"/> Enable the weaponization of a biological agent or toxin                     |
| <input checked="" type="checkbox"/> | <input type="checkbox"/> Any other potentially harmful combination of experiments and agents         |

## ChIP-seq

### Data deposition

- Confirm that both raw and final processed data have been deposited in a public database such as [GEO](#).
- Confirm that you have deposited or provided access to graph files (e.g. BED files) for the called peaks.

#### Data access links

May remain private before publication.

For "Initial submission" or "Revised version" documents, provide reviewer access links. For your "Final submission" document, provide a link to the deposited data.

#### Files in database submission

Provide a list of all files available in the database submission.

#### Genome browser session

(e.g. [UCSC](#))

Provide a link to an anonymized genome browser session for "Initial submission" and "Revised version" documents only, to enable peer review. Write "no longer applicable" for "Final submission" documents.

### Methodology

#### Replicates

Describe the experimental replicates, specifying number, type and replicate agreement.

#### Sequencing depth

Describe the sequencing depth for each experiment, providing the total number of reads, uniquely mapped reads, length of reads and whether they were paired- or single-end.

#### Antibodies

Describe the antibodies used for the ChIP-seq experiments; as applicable, provide supplier name, catalog number, clone name, and lot number.

#### Peak calling parameters

Specify the command line program and parameters used for read mapping and peak calling, including the ChIP, control and index files used.

#### Data quality

Describe the methods used to ensure data quality in full detail, including how many peaks are at FDR 5% and above 5-fold enrichment.

#### Software

Describe the software used to collect and analyze the ChIP-seq data. For custom code that has been deposited into a community repository, provide accession details.

## Flow Cytometry

### Plots

Confirm that:

- The axis labels state the marker and fluorochrome used (e.g. CD4-FITC).
- The axis scales are clearly visible. Include numbers along axes only for bottom left plot of group (a 'group' is an analysis of identical markers).
- All plots are contour plots with outliers or pseudocolor plots.
- A numerical value for number of cells or percentage (with statistics) is provided.

### Methodology

- Sample preparation The spleen and peripheral lymph nodes (PLNs) were gently sparated under 400 mesh sieve using grinding pestle in R2 buffer(RPMI 1640+1mM Hepes+p/s+100ug/ml DNase I). Red blood cells were remover by ACK lysing buffer, followed by washing cells with FACS buffer(PBS+2% FBS+P/S+2mM EDTA(pH 8.0)).
- Instrument LSRFortessa(BD Biosciences) or BD Arialll
- Software FlowJo X 10.0.7r2
- Cell population abundance The purities of the sorted T cells were more than 90%.
- Gating strategy Based on the pattern of FSC-A/SSC-A, cells in the lymphocyte gate were used for analysis of T cell subsets. Singlets were gated according to the pattern of FSC-H vs. FSC-W. Positive populations were determined by the specific antibodies, which were distinct from negative populations.
- Tick this box to confirm that a figure exemplifying the gating strategy is provided in the Supplementary Information.

## Magnetic resonance imaging

### Experimental design

- Design type *Indicate task or resting state; event-related or block design.*
- Design specifications *Specify the number of blocks, trials or experimental units per session and/or subject, and specify the length of each trial or block (if trials are blocked) and interval between trials.*
- Behavioral performance measures *State number and/or type of variables recorded (e.g. correct button press, response time) and what statistics were used to establish that the subjects were performing the task as expected (e.g. mean, range, and/or standard deviation across subjects).*

### Acquisition

- Imaging type(s) *Specify: functional, structural, diffusion, perfusion.*
- Field strength *Specify in Tesla*
- Sequence & imaging parameters *Specify the pulse sequence type (gradient echo, spin echo, etc.), imaging type (EPI, spiral, etc.), field of view, matrix size, slice thickness, orientation and TE/TR/flip angle.*
- Area of acquisition *State whether a whole brain scan was used OR define the area of acquisition, describing how the region was determined.*
- Diffusion MRI  Used  Not used

### Preprocessing

- Preprocessing software *Provide detail on software version and revision number and on specific parameters (model/functions, brain extraction, segmentation, smoothing kernel size, etc.).*
- Normalization *If data were normalized/standardized, describe the approach(es): specify linear or non-linear and define image types used for transformation OR indicate that data were not normalized and explain rationale for lack of normalization.*
- Normalization template *Describe the template used for normalization/transformation, specifying subject space or group standardized space (e.g. original Talairach, MNI305, ICBM152) OR indicate that the data were not normalized.*
- Noise and artifact removal *Describe your procedure(s) for artifact and structured noise removal, specifying motion parameters, tissue signals and physiological signals (heart rate, respiration).*

Volume censoring

Define your software and/or method and criteria for volume censoring, and state the extent of such censoring.

## Statistical modeling & inference

Model type and settings

Specify type (mass univariate, multivariate, RSA, predictive, etc.) and describe essential details of the model at the first and second levels (e.g. fixed, random or mixed effects; drift or auto-correlation).

Effect(s) tested

Define precise effect in terms of the task or stimulus conditions instead of psychological concepts and indicate whether ANOVA or factorial designs were used.

Specify type of analysis:  Whole brain  ROI-based  BothStatistic type for inference  
(See [Eklund et al. 2016](#))

Specify voxel-wise or cluster-wise and report all relevant parameters for cluster-wise methods.

Correction

Describe the type of correction and how it is obtained for multiple comparisons (e.g. FWE, FDR, permutation or Monte Carlo).

## Models & analysis

n/a | Involved in the study

  Functional and/or effective connectivity  Graph analysis  Multivariate modeling or predictive analysis

Functional and/or effective connectivity

Report the measures of dependence used and the model details (e.g. Pearson correlation, partial correlation, mutual information).

Graph analysis

Report the dependent variable and connectivity measure, specifying weighted graph or binarized graph, subject- or group-level, and the global and/or node summaries used (e.g. clustering coefficient, efficiency, etc.).

Multivariate modeling and predictive analysis

Specify independent variables, features extraction and dimension reduction, model, training and evaluation metrics.
